*To be Submitted*

**microRNA-1 represses signaling pathway components to impact embryonic structures derived from all three germ layers**

Nina Faye Sampilo<sup>1</sup> and Jia L. Song<sup>1\*</sup>

<sup>1</sup>Department of Biological Sciences, University of Delaware, Newark, DE 19716

\*Corresponding author:

[jsong@udel.edu](mailto:jsong@udel.edu)

323 Wolf Hall

Newark, DE 19716, USA

Phone: +1 (302) 831-2794

Fax: +1 (302) 831-2281

**Running title:** Function of microRNA-1 during embryogenesis

**Keywords:** sea urchin, skeletogenesis, myogenesis, neurogenesis, gene regulatory network, Nodal, Notch, post-transcriptional regulation

**Abbreviations:**

ALP: alkaline phosphatase; ALR: anterolateral rod; BC: blastocoelar cells; BR: body rod; BE-DVM: border ectoderm-dorsal ventral margin; cWnt: canonical Wnt; DE: dorsal ectoderm; Dpf: days post fertilization; DVC: dorsoventral connecting rod; EMT: epithelial to mesenchymal transition; GRN: gene regulatory network; PC: pigment cells; Hpf: hours post fertilization; PC: pigment cell; PMCs: primary mesenchyme cells; POR: postoral rod; TF: transcription factor; VE: ventral ectoderm; Vegf: vascular endothelial growth factor

**Summary statement:** This study identifies wide-ranging regulatory roles and regulatory mechanisms of miR-1 that impact structures derived from all three germ layers during embryonic development.

## Abstract

microRNAs are evolutionarily conserved non-coding RNAs that direct post-transcriptional regulation of target transcripts. We use the sea urchin embryo to achieve a comprehensive understanding of miR-1's function in a developing embryo. Results indicate that miR-1 regulates gut contractions, specification, and positioning of serotonergic neurons, as well as mesodermally-derived muscles, pigment cells, and skeletogenic cells. Gain-of-function of miR-1 generally leads to more severe developmental defects than its loss-of-function. We identified that miR-1 directly suppresses *Ets1/2*, *Tbr*, and *VegfR7* of the skeletogenic gene regulatory network, and *Notch*, *Nodal*, and *Wnt1* signaling components. We found that miR-1's direct suppression of *Nodal* may indirectly regulate *FoxQ2* to impact serotonergic neurons. Excess miR-1 may lead to decreased *Nodal* and *Notch* that result in decreased circumpharyngeal muscle fibers and the number of pigment cells. The striking ectopic skeletal branching induced by miR-1 mimic injections may be explained by miR-1's direct suppression of *Nodal* that leads to expression changes of *Vegf3*, and *Fgfa* that mediate skeletogenesis. This work demonstrates that miR-1 plays a diverse regulatory role that impacts tissues derived from all germ layers.

## Introduction

microRNA-1 (miR-1) is classified as a myomiR because of its enriched expression in vertebrate muscle tissue and its function in myogenesis, angiogenesis, and vascularization (Mansfield et al., 2004; Sokol and Ambros, 2005; Wienholds et al., 2005; Zhao et al., 2005; McCarthy, 2011). miR-1 has also been implicated in regulating neuronal growth and survival by directly targeting *Bdnf*, *Hes1*, and potentially *Hsp-70* (Varendi et al., 2014; Chang et al., 2016; Yi et al., 2016; Zheng et al., 2017). While there are extensive studies demonstrating miR-1's role in angiogenesis and myogenesis, the exact molecular regulatory mechanisms of miR-1 are still not fully understood. Additionally, a systematic analysis of both loss and gain-of-function of miR-1 in a developing embryo is still lacking.

The miR-1 sequence is highly conserved amongst metazoans (Fig. S1). Most mammalian genomes contain two copies of miR-1 that perform similar functions (Heidersbach et al., 2013). Previously, we found that miR-1 is one of the most expressed miRNAs in the purple sea urchin embryo (Song et al., 2012). The sea urchin has ~50 annotated miRNAs, which is relatively small in contrast to the 519 miRNAs in humans (Song et al., 2012; Fromm et al., 2015). The sea urchin embryo contains a single miR-1, making it feasible to use this embryo to provide a deeper understanding of miR-1's function in development.

The developmental processes of the sea urchin and humans are remarkably similar at the cellular and molecular level (Adonin et al., 2020). Similar to vertebrates, they utilize highly conserved signaling pathways such as the canonical Wnt (cWnt)/ $\beta$ -catenin signaling for anterior-posterior (AP) axis formation (Wikramanayake et al., 1998; Angerer and Angerer, 2000; Komiya and Habas, 2008) and Nodal/Bmp signaling for specification of the dorsal-ventral (DV) secondary body axis (Duboc et al., 2004; Furtado et al., 2008; Chhabra et al., 2019). Immediately after fertilization, maternal inputs, zygotic transcription, and signaling mechanisms help define distinct gene regulatory networks (GRNs) (Fig. 1A) (Logan et al., 1999; Martik et al., 2016). By the mesenchyme blastula stage (24 hours post fertilization; hpf), germ layer specification has already occurred; during gastrulation, the three germ layers are differentiated by cross-regulation between signaling pathways, GRN interactions (Lyons et al., 2012), as well as post-transcriptional regulation mediated by miRNAs (Stepicheva and Song, 2015; Sampilo et al., 2018; Sampilo et al., 2021).

Although the body plans and structures of deuterostomes are diverse, the sea urchin embryo and vertebrates utilize conserved factors for analogous structures. For example, the sea urchin skeletogenesis is thought to be analogous to vertebrate angiogenesis and vascularization since these processes utilize a common set of transcription factors (TFs) (*Ets1/2*, *Erg*, *Hex*, *Tel*, and *FoxO*) and signaling pathways (*Vegf*, *Nodal/Bmp*, *Notch*, and *Angiopoetin*) (Duboc et al., 2005; Morgulis et al., 2019). In response to the *Vegf* ligand in the ectoderm, the sea urchin *VegfR*-expressing skeletogenic primary mesenchyme cells (PMCs) initiate the formation of the skeletal rudiment, differentiate, and pattern (Ettensohn and McClay, 1986; Duloquin et al., 2007; McIntyre et al., 2014). The migrating PMCs form a syncytium, connected by filopodial membranes between cell bodies where biomineralization enzymes form calcite granules (Ettensohn and McClay, 1986; Armstrong and McClay, 1994; Wilt, 2002). Similarly, the sea urchin larva utilizes similar TFs as vertebrates (*FoxA*, *GataE*, *Xlox*, *Cdx*) critical for gut differentiation (Annunziata et al., 2019). The tripartite gut is compartmentalized with the cardiac, pyloric, and anal sphincters (Fig. 2B) (Yaguchi and Yaguchi, 2019). For the nervous system, the sea urchin embryo has serotonergic neurons and ganglia located in the apical organ that is analogous to the vertebrate central nervous system and sensory and motor neurons within the ciliary band that is analogous to the peripheral nervous system that control swimming and feeding behaviors (Yaguchi and Katow, 2003; Wood et al., 2018; Yaguchi and Yaguchi, 2021). Additionally, the sea urchin embryo uses orthologous neuronal transcriptional factors as those expressed in the vertebrate forebrain (*Six3*, *ZIC2*, *Achaete-scute*, *NKX2.1* and *FEZ*) (Wei et al., 2009). Thus, using the sea urchin as a simple and experimentally tractable organism, we can better understand complex molecular mechanisms.

We discovered that miR-1 regulates the endodermally-derived gut contractions, specification and positioning of ectodermally-derived serotonergic neurons, as well as mesodermally-derived circumpharyngeal muscles, pigment cells (PCs), and skeletogenesis. Interestingly, gain-of-function of miR-1 leads to more severe developmental defects than its loss-of-function. We further identified miR-1 to directly suppress *Ets1/2*, *Tbr*, and *VegfR7* of the PMC GRN, and signaling components *Notch*, *Nodal*, and *Wnt1*. We found that miR-1's direct suppression of *Nodal* may indirectly regulate *FoxQ2* to impact serotonergic neurons. miR-1 mimic-induced overexpression may lead to decreased *Nodal* and *Notch* that result in decreased circumpharyngeal muscle fibers and the number of pigment cells. Additionally, excess miR-1 also resulted in numerous ectopic skeletal branching that may be explained by miR-1's direct

suppression of *Nodal* that leads to expression changes of *Vegf3* and *Fgfa* that mediate patterning and skeletogenesis, respectively. This study identifies wide-ranging regulatory roles and regulatory mechanisms of miR-1 that impact structures derived from all three germ layers during embryonic development.

## Experimental Procedures

### Animals

Adult purple sea urchin, *Strongylocentrotus purpuratus* (*Sp*), were obtained from Point Loma Marine Invertebrate Lab, (Lakeside, CA) and Marinus Scientific, LLC (Long Beach, CA). Adult males and females were intracoelomically injected with 0.5 M KCl to obtain sperm and eggs. Filtered natural seawater (FSW) (collected from Indian River Inlet; University of Delaware) or artificial seawater (ASW) made from Instant Ocean© was used for embryo cultures incubated at 15°C.

### Cloning

For generating 3'UTR luciferase reporter constructs of predicted miR-1 targets, PCR primers, or FragmentGENE DNA fragments (Genewiz, South Plainfield, NJ) were designed based on sequence information available from the sea urchin genome (echinobase.org) (Table S1). Amplified PCR products of *Bmp2/4*, *Ets1/2*, *Notch*, *Nodal*, and *Tbr* 3'UTRs were first cloned into ZeroBlunt vector (Thermo Fisher Scientific, Waltham, MA), and then subcloned into the *Renilla* luciferase (*Rluc*) reporter construct. Wildtype (WT) constructs of *IgTM* and *Nodal* were commercially synthesized prior to cloning. *VegfR7* and *Wnt1* 3'UTRs were previously cloned (Stepicheva and Song, 2015; Sampilo et al., 2021). Mutations were generated within the miR-1 seed sequences using the QuikChange Lightning or QuikChange Multi Site-Directed Mutagenesis Kit (Agilent Technologies, Santa Clara, California) to disrupt miR-1's binding and regulatory function (Gregory et al., 2008; Stepicheva et al., 2015). The predicted miR-1 seed sites (canonical site: 5' ACATTCC 3') within the 3'UTRs of *Ets1/2*, *Dri*, *Tbr*, *VegfR7*, *Notch*, *Nodal*, *Bmp2/4*, *Wnt1*, and *IgTM* were modified at the third and fifth base pair (Table S1). We have previously demonstrated that truncated miRNA seed sequence differing in one nucleotide at the 5' end is sufficient in miRNA-mRNA target recognition and function (Sampilo et al., 2021). *Nodal* and *Wnt1* contain truncated miR-1 sites (6 out of 7 bps), and *Bmp2/4* and *IgTM* contain mismatched miR-1 seed sites which differ in one nucleotide within the seed sequence (Table. S1). Only two of the three potential miR-1 binding sites within *Nodal* 3'UTR were mutated due to sequence complexity. Firefly luciferase was used as a normalization control as previously described (Stepicheva et al., 2015). Each of the construct sequences were verified by DNA sequencing

(Genewiz, South Plainfield, NJ). Luciferase constructs containing *Ets1/2*, *VegfR7*, *Nodal*, and *IgTM* 3'UTRs were linearized with *EcoRI*, while *Tbr*, *Bmp2/4*, and *Wnt1* 3'UTRs were linearized with *NotI*. The luciferase constructs and *Firefly* luciferase mRNA were *in vitro* transcribed using the Sp6 mMessage machine kit (Ambion Inc, Austin, Texas). *In vitro* transcribed mRNAs were purified using Macherey-Nagel Nucleospin® RNA Clean-up kit (Macherey-Nagel, Bethlehem, PA) prior to injections.

## Microinjections

Microinjections were performed as previously described (Cheers and Etensohn, 2004; Stepicheva and Song, 2014) with modifications. All injection solutions were prepared in a 2.5  $\mu$ l solution consisting of 20% glycerol and 0.4  $\mu$ g/ $\mu$ l of 10,000 MW neutral non-fixable Texas Red dextran (Thermo Fisher Scientific, Waltham, MA). Approximately 1-2 picoliter was injected into each newly fertilized egg based on the size of the injection bolus at about one-fifth of the egg diameter. miR-1 miRCURY LNA miRNA Power Inhibitor and miRCURY LNA miRNA mimic were obtained from Qiagen (Germantown, MD). miR-1 inhibitor (Hsa-miR-1-3p, ID# YI04100840; 5'-UGGAAUGUAAAGAAGUAUGUAU-3') and miR-1 miRCURY LNA miRNA mimic (ID#YM00472818; 5'-UGGAAUGUAAAGAAGUAUGUAU-3') were used at 10  $\mu$ M, 30  $\mu$ M and 40  $\mu$ M concentrations. Cel-miR-39-3p LNA mimic (ID#YM00479902; 5'-UCACCGGGUGUAAAUCAGCUUG-3') was used as an injection control (not present in the sea urchin or humans). miR-1 inhibitor and miR-1 mimic were co-injected at a 1:1 molar ratio (40  $\mu$ M miR-1 inhibitor + 40  $\mu$ M miR-1 mimic) to test the specificity of miR-1 inhibitor.

## Dual-luciferase quantification

The injection solutions for the dual-luciferase assay contained 20% sterile glycerol, 0.4  $\mu$ g/ $\mu$ l 10,000 MW Texas Red lysine-charged dextran, 100-200 ng/ $\mu$ l *Firefly* mRNA, and 100 ng/ $\mu$ l *Rluc* mRNA (*Ets1/2*, *Dri*, *Tbr*, *VegfR7*, *Notch*, *Nodal*, *Bmp2/4*, *Wnt1*, and *IgTM*). 20-50 embryos were collected at the mesenchyme blastula stage (24 hpf). Dual-luciferase assays were performed using the Promega Dual-Luciferase Reporter (DLR™) Assay Systems with the Promega GloMax 20/20 Luminometry System (Promega, Madison, WI) (Stepicheva et al., 2015; Stepicheva and Song, 2015; Sampilo et al., 2018; Sampilo et al., 2021). The *Rluc* values were normalized to the *Firefly* signal to account for microinjection volume differences. *Rluc* data with mutated miR-1

seed sites were normalized to the *Rluc* with wildtype (WT) 3'UTR constructs. P-value was analyzed using Student's t-test. All error bars represent Standard Error (SEM).

## **Immunofluorescence**

Gastrulae and larvae were fixed in 4% paraformaldehyde (PFA) (20% stock; EMS, Hatfield, PA) in FSW overnight at 4°C (1D5, Serotonin, and Sp1), or fixed with 3.7% PFA for 20 min at RT followed by 1 min post-fix with ice-cold methanol (for SynB). 10X Phosphate Buffered Saline (PBS) (Bio-Rad, Hercules, CA) was diluted at 1:10. Three PBS-Tween (0.05% Tween-20 in 1X PBS for 1D5) or PBS-Triton (0.1% Triton in 1X PBS for Serotonin, Sp1, and SynB) washes were performed, followed by 1 h block with 4% sheep serum (MilliporeSigma, St. Louis, MO). 1D5 antibody was used at 1:50 to visualize PMCs (McClay et al., 1983); serotonin at 1:500 (MilliporeSigma, Cat#S5545) to visualize serotonergic neurons; Sp1 at 1:200 to visualize pigment cells (Developmental Studies Hybridoma Bank, Iowa City, Iowa, Cat#531884); and SynB at 1:200 to visualize mature and functional neurons (Burke et al., 2006; Leguia et al., 2006) (gift from Dr. Gary Wessel, Brown University). Antibodies were diluted in PBS-Tween/Triton with 4% sheep serum, and embryos were incubated overnight to 3 days at 4°C and washed 3 times with PBS-Tween/Triton, followed by goat-anti mouse (1D5 and Sp1) or anti-rabbit (Serotonin and SynB) secondary antibody (Thermo Fisher Scientific, Waltham, MA) at 1:300 for 1 h at RT. Embryos were then washed 3 times with PBS-Tween/Triton and mounted on slides for confocal imaging. For visualization of DNA, embryos were counterstained with Hoechst dye (Lonza, Walkersville, MD), DAPI (Thermo Fisher Scientific, Waltham, MA), or VECTASHIELD® Antifade Mounting Medium with DAPI (Vector Laboratories, Burlingame, CA).

## **Whole mount *in situ* hybridization (WMISH)**

Partial coding sequences of *Bmp2/4*, *FoxA*, *FoxQ2*, *Krl*, *Nodal*, *Not1*, *Vegf3*, and *Wnt1* were cloned into ZeroBlunt vector to generate RNA probes (Thermo Fisher Scientific, Waltham, MA) Constructs were linearized using FastDigest™ (Thermo Fisher Scientific, Waltham, MA) and *in vitro* transcribed with DIG RNA Labeling Kit (Millipore Sigma, St. Louis, MO) (Table S2). *FoxA*, *Krl*, *Vegf3* and *Wnt1* RNA probes were previously cloned (Stepicheva and Song, 2015; Sampilo et al., 2021). WMISH was conducted according to previous publications (Arenas-Mena



et al., 2000; Minokawa et al., 2004; Stepicheva et al., 2015; Stepicheva and Song, 2015). Probes were used at 1 ng/ $\mu$ l and incubated at 50°C for 5-7 days.

To test endodermal differentiation, we examined the activity of alkaline phosphatase (Kumano and Nishida, 1998; Drawbridge, 2003). Larvae 5 days post fertilization (5 dpf) were fixed in MOPS-paraformaldehyde based fixative (4% paraformaldehyde, 100 mM MOPS pH 7, 2 mM MgSO<sub>4</sub>, 1 mM EGTA, and 0.8 M NaCl) for 10 min at RT as previously described (Stepicheva et al., 2015). Embryos were then washed with alkaline phosphatase buffer 3 times (100 mM Tris pH 9.5, 100 mM NaCl, 50 mM MgCl<sub>2</sub>, 0.1% Tween-20), followed by staining until the desired color was developed with the staining solution (0.1 M Tris pH 9.5, 50 mM MgCl<sub>2</sub>, 0.1 M NaCl, 1 mM Levamisole, 10% Dimethylformamide, 50 mg/ml NBT in 70% dimethyl formamide and 50 mg/ml BCIP in 100% dimethyl formamide). Staining was stopped with multiple washes of MOPS buffer (0.1 M MOPS pH 7, 0.5M NaCl, and 0.1% Tween-20).

### **Imaging and Phenotyping**

Representative images were taken with Zeiss LSM 880 scanning confocal microscope using Zen software or ZEISS Observer Z1 using AxioVision software (Carl Zeiss Microscopy, LLC, White Plains, NY). For videos of pigment cells and gut contractions, live embryos were collected 5 dpf and mounted in FSW onto protamine sulfate (PS)-coated coverslips, creating a positively-charged surface (Stepicheva and Song, 2014). For live behavior examination, control injected, miR-1 inhibitor, and miR-1 mimic-injected embryos were mounted on the same multichambered PS-coated coverslip to avoid variability of environmental conditions and response. To measure dorsoventral connecting rod (DVC) length or PMC migration, ZEISS Observer Z1 microscope was used to take Z-stacks of differential interference contrast (DIC) and 1D5-immunolabeled images. ZEISS AxioCam105 color camera was used to take *in situ* images. AxioVision or Zen 3.1 software (Carl Zeiss Microscopy, White Plains, NY) was used to measure the length of DVCs, PMC migration distance, *in situ* expression domains and to determine the center of gastrulae in vegetal views to measure angles of *Vegf3*, *Wnt1*, *Nodal*, *Not1*, and *Bmp2/4* expression domains, ventral ectodermal (VE), and dorsal ectodermal (DE) domains. N is the total number of embryos examined unless otherwise stated. NS = not significant, \*p < 0.05, \*\*p < 0.001, \*\*\*p < 0.0001. All error bars represent SEM.

To measure the average intensity levels of arbitrary fluorescent units (intensity) in larvae immunolabeled with serotonin and SynB, maximum intensity projection images were analyzed with ImageJ (Schneider, 2012; Remsburg et al., 2021). Serotonin and SynB expression within the ciliary band was measured and the background was subtracted.

### **Real-Time, quantitative PCR (qPCR)**

To examine the levels of endogenous miR-1 expression within a developing embryo, 200-500 embryos were collected at various developmental stages (Fig. 1C). Purification of total RNA was done using miRNAeasy Micro Kit (QIAGEN, Germantown, MD). cDNA synthesis of 100 ng total RNA was performed with miRCURY LNA RT Kit (10  $\mu$ l volume reaction) which adds a 5' universal tag of a poly(A) tail to mature miRNA templates (QIAGEN, Germantown, MD). cDNA template was diluted 1:10, and miRNA qPCR was performed using miRCURY LNA miRNA PCR Assays (QIAGEN, Germantown, MD) in QuantStudio 6 Real-Time PCR cycler system (Thermo Fisher Scientific, Waltham, MA). Sea urchin miR-200 were used as normalization controls due to its similar expression from the cleavage to the larval stages (Song et al., 2012). Results are shown as fold changes compared to the egg stage using the  $Ct^{-2\Delta\Delta}$  method as previously described (Stepicheva et al., 2015). miRCURY LNA miRNA PCR Primer Mix is against human miR-1 (Hsa-miR-1-3p).

To measure the transcriptional changes of key TFs for ectodermal, endodermal, and mesodermal specification, transcripts that encode TFs of the skeletogenic GRN, and biomineralization enzymes, we injected zygotes with control, miR-1 inhibitor, and miR-1 mimic. 100 of these blastulae were collected at 24 hpf. Total RNA was extracted by using the Macherey-Nagel Nucleospin® RNA Clean-up XS kit (Macherey-Nagel, Bethlehem, PA). cDNA was synthesized using iScript cDNA synthesis kit (Bio-Rad, Hercules, CA). qPCR was performed using 2.5 embryo equivalents for each reaction with the Fast SYBR or PowerUp Green PCR Master Mix (Thermo Fisher Scientific, Waltham, MA) in the QuantStudio 6 Real-Time PCR cycler system (Thermo Fisher Scientific, Waltham, MA). Results were normalized to the mRNA expression of ubiquitin and depicted as fold changes compared to control embryos using the  $Ct^{-2\Delta\Delta}$  method as previously described to analyze the relative changes in gene expression (Stepicheva et al., 2015). Primer sequences were designed using the Primer 3 Program (Rozen and Skaletsky,

2000) and are listed in Table S3. 3-6 biological replicates were conducted. Statistical significance was calculated using two-tailed unpaired Student's t-tests.

## Results

### **Expression of miR-1 peaks at gastrula stage and is enriched in the larval gut and ciliary band.**

miR-1 is expressed maternally. At the 32-cell stage, the expression of miR-1 is enriched in the perinuclear region (Fig. 1B). miR-1 expression peaks at the gastrula stage with ubiquitous expression. At the larval stage, miR-1 is enriched in the gut and ciliary band (Fig. 1B). These results are consistent with relative quantitative levels of miR-1 using real-time, qPCR (Fig. 1C).

### **miR-1 modulates endodermal differentiation and gut function**

To examine the function of miR-1 in early development, we injected miR-1 inhibitor for loss-of-function studies or miR-1 mimic for gain-of-function studies. To test the efficacy of the miR-1 inhibitor, zygotes were injected with control or miR-1 inhibitor, followed by miR-1 FISH (Fig. 2A). We observed a reduction of miR-1 in 100% of miR-1 inhibitor-injected gastrulae, indicating the effectiveness of the miR-1 inhibitor.

Results indicate that miR-1 perturbed embryos have aberrant gut morphology compared to the control (Fig. 2B). In miR-1 inhibitor-injected larvae, width of midgut (MG) is smaller compared to control (Fig. 2Bi). Conversely, in miR-1 mimic-injected larvae, width of MG and hindgut (HG), in addition to length of MG is much wider compared to control (Fig. 2Bi-iii). We further used alkaline phosphatase (ALP) staining as a marker for endodermal differentiation (Drawbridge, 2003; Stepicheva et al., 2015). Control-injected embryos have ALP activity within the MG and part of the HG, whereas miR-1 perturbed larvae exhibited a loss of ALP within the HG and/or in the MG (Fig. 2Biv). Interestingly, both miR-1 inhibitor and miR-1 mimic-injected larvae have significantly less foregut and hindgut contractions compared to the control, indicating a potential defect in gut functions (Fig. 2C, Movies 1-3).

We examined the spatial expression of *Krl* and *FoxA* that are important for specifying the foregut and midgut (Oliveri et al., 2006; Yamazaki et al., 2008). In miR-1 perturbed embryos, the spatial expression of *Krl* and *FoxA* expanded, and *Krl*'s expression also shifted anteriorly compared to control (Fig. 2D). The spatial expression changes of key TFs involved in endodermal specification could in part contribute to the morphological changes in the larval gut. Results indicate that miR-1 may regulate gut morphology, differentiation, and function.

### **Perturbation of miR-1 results in circumpharyngeal muscle defects**

Since defects in gut contraction may attribute to gut muscle defects, we examined the structure of the circumpharyngeal muscles (Fig. 3). The number of filamentous actin-rich fibers (F-actin) within the muscle fiber ring was significantly decreased and less structured in both miR-1 perturbed larvae compared to the control. Almost 20% of miR-1 mimic-injected larvae had a complete loss of detectable F-actin (Fig. 3). The miR-1 inhibitor-induced defects were rescued by co-injection with the miR-1 mimic, indicating that the muscle fiber defects are due to miR-1 perturbation.

### **Perturbation of miR-1 impacts neuronal development**

Since gut contractions are in part mediated by serotonin (Yaguchi and Yaguchi, 2021), we examined the level of serotonin, number, and positioning of serotonergic neurons (Fig. 4A). Compared to control, miR-1 inhibitor-injected embryos had decreased levels of serotonin and fewer serotonergic neurons, while miR-1 mimic-injected embryos had a higher serotonin levels and more serotonergic neurons (Fig. 4Ai-ii). Additionally, we observed that serotonergic neurons in control-injected larvae were positioned linearly in the animal plate, whereas serotonergic neurons in miR-1 mimic-injected larvae are dispersed throughout the apical organ or within the ciliary band (Fig. 4Aiii). We also observed miR-1 perturbed embryos exhibited a significant decrease in mature and functional neurons compared to the control, as indicated by the immunolabeling of SynB-expressing neurons (Fig. 4B).

Since *FoxQ2* is required for serotonergic neural specification and must be downregulated for their differentiation (Yaguchi et al., 2012), we examined its expression. We observed that miR-1 inhibitor-injected embryos have expanded *FoxQ2* expression domain, while miR-1 mimic-injected embryos have decreased *FoxQ2* expression domain compared to control (Fig. 4C).

### **miR-1 regulates pigment cell number and morphology**

PCs are derived from the mesoderm and has an essential role in the innate immune defense system (Fig. 1A) (Tokuoka et al., 2002; Smith et al., 2006). In control embryos, PCs have long filopodial extensions (Fig. 5). In miR-1 inhibitor-injected larvae, PCs are clumped or rounded, whereas PCs in miR-1 mimic-injected larvae have multiple long filopodial extensions (Fig. 5Ai).

In addition, while inhibition of miR-1 did not affect the number of PCs, miR-1 mimic-injections resulted in a significant decrease of PCs compared to control (Fig. 5Aii).

We further examined the behavior of PCs and observed that PCs of control larvae travel in a linear fashion with occasional bifurcated filopodial extensions (Fig. 5Ai, Movie 4). In miR-1 inhibitor-injected larvae, their rounded PCs move with membranous blebs, whereas miR-1 mimic-injected larvae form multifurcated filopodial extensions that travel in multiple directions (Fig. 5Ai, Movies 5,6).

We examined the spatial expression of blastocoelar cell (BC) TF *Ese* (oral/ventral mesoderm) and pigment cell marker *Pks1* (aboral/dorsal mesoderm) in the mesenchyme blastula stage, when PCs and BCs become specified (Fig. 5B) (Materna et al., 2013). We observed that both inhibitor and miR-1 mimic-injections resulted in increased *Ese* and decreased *Pks1* expression domains, with miR-1 mimic-injected embryos having a more dramatic decrease in the expression domain of *Pks1* (Fig. 5).

### **miR-1 perturbations result in less PMCs and a delay in PMC ingression**

To assess how miR-1 perturbation impacts PMC specification and/or ingression, we used the *VegfR10* RNA probe to mark and follow PMCs during early gastrulation in a time-course experiment. While undergoing epithelial to mesenchymal transition (EMT), PMCs appear as ‘bottle-shaped’, whereas cells that have completed EMT have a ‘round cell shape’ (Lyons et al., 2012; Sampilo et al., 2021). Using the cell shape as a criterion for EMT, we found miR-1 perturbation resulted in a significant delay of PMC ingression during gastrulation (Fig. 6Ai,Bi). miR-1 perturbed embryos also had an average of three PMCs less than control embryo (Fig. 6Aii,Bii).

### **Perturbation of miR-1 results in skeletal defects**

During gastrula stage, we observed that miR-1 inhibitor and miR-1 mimic-injections resulted in decreased length of DVCs in a dose-dependent manner (Fig. 7A,B). miR-1 inhibitor-induced skeletal defects were rescued by co-injection of a miR-1 mimic, indicating that this defect is specifically induced by miR-1 inhibition (Fig. 7A). Interestingly, both miR-1 perturbations resulted in supernumerary tri-radiate rudiments and a similar ectopic skeletal branching off one of the tri-radiate arms (Fig. 7C).

miR-1 inhibitor-injected larvae were underdeveloped, lacked body rod (BR) convergence, and/or occasionally exhibited ectopic BR branching (Fig. 7D). miR-1 mimic-injected larvae had a dose-dependent severity of abnormal and supernumerary skeletal branching off the postoral rods (POR), anterolateral rods (ALR), and BRs (Fig. 7D). We also observed independent skeletal elements developed perpendicular to the larval BRs. Based on the dose-response data, 40  $\mu$ M of miR-1 inhibitor and 30  $\mu$ M of miR-1 mimic were used throughout this study. Overall, these results indicate that miR-1 plays a critical role in the initial formation and elongation of the skeletal spicules and that miR-1 mimic-injections induced a more severe skeletal defect than miR-1 inhibitor-injections.

### **Perturbation of miR-1 results in PMC patterning defects**

Since we observed skeletal branching defects (Fig. 7), we examined the patterning of PMCs, which are the only cells that make the skeleton (Ettensohn and McClay, 1986) (Fig. 8). In miR-1 inhibitor-injected gastrulae, we found that while the patterning of PMCs was not greatly affected, PMCs were clustered posteriorly and had less anterior migration compared to control (Fig. 8Ai-ii). This decreased migration in miR-1 inhibitor-injected embryos was rescued by co-injection of miR-1 mimic, indicating that this defect is due to inhibition of miR-1. In miR-1 mimic-injected gastrulae, the PMCs were dispersed and migrated to the animal pole (Fig. 8Bi-ii). miR-1-inhibitor-injected larvae had occasional PMCs positioned off a skeletal branch (Fig. 8Ci), whereas miR-1 mimic-injected larvae had many PMCs positioned off all branches (Fig. 8Cii).

### **miR-1 directly targets components of skeletogenic GRN and signaling pathways**

To reveal the regulatory molecular mechanism of miR-1, we bioinformatically searched for potential miR-1 binding sites within transcripts that encode regulators of the PMC GRN and key components of signaling pathways. Using *Rluc* reporter construct and site-directed mutagenesis, we identified miR-1 to directly repress *Ets1/2*, *Tbr*, *VegfR7*, *Notch*, *Nodal*, and *Wnt1*. miR-1 may have weak miRNA-mRNA binding affinity with *Dri* (Fig. 9A,B).

### **miR-1 mimic-injections result in ectopic expression domains of several factors.**

To identify the molecular mechanism of how miR-1 regulates skeletogenesis, embryos were collected at gastrula stage and hybridized with *Vegf3*, *Wnt1*, *Nodal*, *Not1*, and *Bmp2/4* RNA

probes (Fig. 10). In miR-1 inhibitor-injected gastrulae, the lateral and vegetal expression domains of *Vegf3* were significantly decreased compared to control (Fig. 10Ai). Concurrently, the vegetal expression domains of *Nodal* and *Not1* were expanded, without expression domain change of *Bmp2/4* (Fig. 10Bi). In miR-1 mimic-injected gastrulae, the lateral expression of *Vegf3* had no expression domain change; however, its vegetal expression domain was significantly expanded into both the VE and DE domains (Fig. 10Aii,Bii). In contrast to miR-1 inhibitor-injected embryos, the miR-1 mimic-injected embryos had *Nodal*, *Not1*, and *Bmp2/4* decreased in the vegetal expression domains, while *Wnt1* was increased compared to control. Results indicate that *Vegf3* expression domains in miR-1 perturbed embryos correlated to changes in expression domains of *Nodal*, *Bmp2/4*, and *Wnt1*.

### **miR-1 regulates expression of key endodermal, ectodermal, and mesodermal transcripts.**

To identify the underlying molecular mechanism of how miR-1 impacts structures derived from the three germ layers, we tested expression levels of key TFs involved in endodermal, ectodermal, and mesodermal specification (Fig. 11A). Results indicate that miR-1 inhibition resulted in a 2-fold increase in *Krl* and *FoxA*, while *Onecut* decreased 2-fold. miR-1 mimic-injections resulted in almost a 2-fold increase in *Onecut*, and *Ese*, while *Tropo1*, *MHC*, and *Pks* had a >2-fold decrease.

To identify the underlying molecular mechanism that led to PMC patterning and skeletal branching defects, we examined the relative expression levels of transcripts that encode PMC specification and patterning (*Ets1/2*, *Dri*, *Tbr*, *Snail*, *Nodal*, *Bmp2/4*, *Not1*, *Vegf3*, *Wnt1*, *FgfA* and *CDC42*) (Röttinger et al., 2004; Duloquin et al., 2007; Röttinger et al., 2008; Duboc et al., 2010; Adomako-Ankomah and Etensohn, 2013; Sepúlveda-Ramírez et al., 2018), biomineralization enzymes (*P19*, *p58A*, *SM30*, *SM50*) (Cheers and Etensohn, 2005; Livingston et al., 2006; Adomako-Ankomah and Etensohn, 2011), PMC-specific cell surface protein *Msp130* (Leaf et al., 1987), and PMC adhesion protein *KirrelL* (Etensohn and Dey, 2017), and markers of dorsal PMCs (*Tbx2/3* and *GataC*) (Duboc et al., 2010) (Fig. 11B). Results indicate that inhibition of miR-1 results in a 2-fold increase in transcript levels of *Ets1/2*, *Notch*, and *CDC42*, while miR-1 mimic-injections resulted in decreased transcript levels of these same genes. Inhibition of miR-1 resulted in an almost 2-fold increase in *Dri*, *Tbr*, and *Snail*. Both miR-1 inhibitor and miR-1 mimic-injections resulted in ~2-fold decrease in *GataC*, *Tbx2/3*, *SM30*, and *SM50*.



## Discussion

We identified miR-1 to have a diverse role in embryogenesis, in addition to its conserved function in muscle-specific tissues. In the sea urchin, miR-1 is one of the most abundantly expressed miRNAs, and was able to rescue severe embryonic lethality induced by knockdown of Droscha and/or Dicer when co-injected with the three other highly sequenced miRNAs in the sea urchin (miR-31, miR-71, and miR-2012) (Song et al., 2012), suggesting that miR-1 is required for proper early development. We identified miR-1 to not only regulate mesodermally-derived structures, which include muscles, PCs, and skeletogenesis, but also gut morphology and function, and specification and positioning of serotonergic neurons.

We observed that the gut morphology and contractions in miR-1 perturbed larvae were altered compared to control (Fig. 2Bi-iii, 2C, Movies 1-3). Both miR-1 inhibitor and mimic-injected embryos have expanded expression domains of *Krl* and *FoxA* (Fig. 2B-D). Previously, *Krl* knockdown resulted in missing foregut and delayed gastrulation (Howard et al., 2001; Yamazaki et al., 2008), while *FoxA* knockdown reduces gut size (Oliveri et al., 2006). Consistent with our *in situ* data, miR-1 inhibition resulted in a 2-fold increase of *Krl* and *FoxA* (Fig. 11A). Since *Krl* and *FoxA* do not contain canonical miR-1 binding sites, miR-1 may indirectly modulate them to impact gut development. In addition, we found that miR-1 directly suppresses *Notch* and *Wnt1* (Fig. 9). Consistent with prior work, *Notch2* is a known miR-1 target (Liu et al., 2018; Hua et al., 2019). *Notch* knockdown embryos resulted in decreased *Krl* levels (Yamazaki et al., 2008), and *Wnt1* knockdown resulted in decreased *FoxA* levels (Cui et al., 2014). Thus, miR-1 inhibitor-injected embryos may have increased Notch and Wnt1, which may result in increased *Krl* and *FoxA*. While *Krl* and *FoxA* expression domain expanded in miR-1 mimic-injected embryos, their levels did not increase (Figs. 2D, 11A). How miR-1 mimic-injection resulted in expanded *Krl* and *FoxA* is unclear. miR-1 may also regulate transcripts that encode other undefined factors important for endodermal differentiation, gut morphology, and function.

The defective gut contractions in miR-1 perturbed larvae may be due to problems with the muscle fibers and/or neural coordination. We observed that miR-1 perturbed larvae have decreased number of F-actin muscle fiber rings (Fig. 3). Previous work has shown Delta/Notch signaling to play critical roles in vertebrate myogenesis (Kopan et al., 1994; Conboy and Rando, 2002; Schuster-Gossler et al., 2007), and knockdown of either Delta or Notch in the sea urchin embryos resulted in decreased muscle fibers (Sweet et al., 2002; Range et al., 2008). We showed that miR-

1 directly suppresses *Notch*, indicating that the defective muscle fibers in miR-1 perturbed larvae may be in part explained by miR-1's direct suppression of *Notch* (Fig. 9A). Additionally, we bioinformatically identified miR-1 to have predicted truncated and/or mismatched miR-1 binding sites within *MHC* and *Tropo1*, which are conserved muscle differentiation genes (Mu et al., 2007; Andrikou et al., 2013; Annunziata et al., 2014; Jin et al., 2016). In the sea urchin, both are expressed in circumesophageal muscle fibers, and *MHC* is also expressed in all the sphincters (Andrikou et al., 2013; Annunziata et al., 2014). In vertebrates, various MHC isoforms are expressed in the upper esophageal sphincter and have distinct contractile properties (Mu et al., 2007). The exact function of *Tropo1* in the sea urchin is unknown; however, in vertebrates, *Tropo1* is critical in cardiac development and contractile function of skeletal muscles (Jin et al., 2016; England et al., 2017). While the levels of *MHC* and *Tropo1* transcripts in miR-1 inhibitor-injected embryos did not change compared to the control, their levels were decreased 2-fold in miR-1 mimic-injected embryos (Fig. 11A). Interestingly, miR-1 is enriched in the larval gut (Fig. 2B), suggesting that it may post-transcriptionally regulate *MHC* and *Tropo1* that may impact the organization of the F-actin of the muscle fibers and/or gut contractions. Additionally, since serotonin can regulate the pyloric opening of the larval gut (Yaguchi and Yaguchi, 2021), aberrant serotonin expression in miR-1 perturbed embryos may also contribute to decreased gut contractions (Figs. 2C,4A).

We found that in comparison to control larvae, miR-1 inhibitor-injected larvae had lower serotonin levels and fewer serotonergic neurons, while miR-1 mimic-injected larvae had increased serotonin levels and a higher number of serotonergic neurons (Fig. 4A). We propose that miR-1 regulates the specification of serotonergic neurons, potentially through *FoxQ2*. *FoxQ2* is required early for the specification of serotonergic neurons and must be removed from the apical plate by late gastrula stage to allow differentiation of serotonergic neurons (Yaguchi et al., 2008; Yaguchi et al., 2012). In miR-1 inhibitor-injected blastulae, the expression domain of *FoxQ2* is expanded (Fig. 4C), consistent with prior findings where expanded *FoxQ2* in LRP6-morphants correlated with a complete loss of serotonergic neurons (Yaguchi et al., 2016). In miR-1 mimic-injected blastulae, *FoxQ2* expression domain became more restricted which may result in increased serotonergic neurons (Figs. 4A,C). It appears that while the spatial expression of *FoxQ2* was altered in miR-1 perturbed embryos, *FoxQ2* levels did not change (Fig. 11A). Since *FoxQ2* does

not contain potential miR-1 binding sites, we speculate that miR-1 may indirectly regulate expression of *FoxQ2* in early development.

miR-1's regulation of *FoxQ2* may be through its direct suppression of *Nodal*. (Fig. 9). *Nodal* has been implicated in promoting neuronal specification in humans and in sea urchins (Smith et al., 2008; Patani et al., 2009; Yaguchi et al., 2016; McClay et al., 2018). In *Nodal* morphants, *FoxQ2* expression domain in blastulae became more restricted (Yaguchi et al., 2016), and this restriction of *FoxQ2* expression domain is similar to what was observed in miR-1 mimic-injected blastulae (Fig. 3C). Thus, miR-1 may suppress *Nodal* to indirectly restrict *FoxQ2*. Interestingly, serotonergic neurons of *Nodal* morphants were dispersed throughout the apical domain (Yaguchi et al., 2016), similar to what we observed in miR-1 mimic-injected larvae (Fig. 3A). *Nodal/Bmp* signaling along the DV axis is critical for regulating the specification of the neuroectoderm and patterning within the apical domain (Duboc et al., 2004; Yaguchi et al., 2016). In the sea urchin, *Nodal* signaling suppresses serotonergic neuronal differentiation from the oral/ventral side of the animal plate (Yaguchi et al., 2007; Yaguchi et al., 2016). Thus, potentially, aberrant *Nodal* expression induced by miR-1 overexpression may lead to mispositioning of these serotonergic neurons.

Additionally, we found that miR-1 perturbation resulted in a significant decrease in SynB-positive neurons compared to the control (Fig. 4B). SynB mediates neurotransmitter release of synaptic vesicles in mature and functional neurons (Burke et al., 2006; Yang et al., 2015). Since neuronal TFs *SoxB1* and *SoxC*, which regulate neuronal specification (Angerer et al., 2005; Garner et al., 2016; Niwa et al., 2016), were not significantly altered under miR-1 perturbation (Fig. 11A), this indicates that miR-1 may regulate neuronal development by suppressing *Nodal*, and indirectly *FoxQ2*, as well as other TFs during neuronal differentiation.

We then examined mesodermally-derived structures in miR-1 perturbed embryos. In the sea urchin, PCs migrate throughout the larval ectoderm to carry out immune defense (Takata and Kominami, 2003; Smith et al., 2006). miR-1 mimic-injected larvae have fewer PCs, correlating to decreased expression of *Pks1* (Figs. 5, 11A). During development, PCs and BCs share the same progenitor cells and make a binary fate decision during the blastula stage (Sweet et al., 1999). Their specification is regulated by both *Nodal* and Notch signaling pathways, where *Nodal* initiates specification by activating TFs that specify BCs and inhibiting TFs that specify PCs; later Notch signaling promotes differentiation of both BCs and PCs (Duboc et al., 2010). *Nodal* overexpression

resulted in a lack of *Pks1*-expressing PCs and expanded expression of BC markers *GataC* and *Ese* (Duboc et al., 2010). Knockdown of *Notch* resulted in fewer PCs and BCs (Sweet et al., 1999; Peterson and McClay, 2005). Taken together, miR-1's regulation of both *Nodal* and *Notch* is likely to contribute to BC and PC specification. PCs in miR-1 perturbed larvae exhibited different morphology and behavior when compared to control (Fig. 5, Movies 4-6). How miR-1 regulates the morphology and movement of PCs remains unclear; however, miR-1 perturbation affects the expression of *CDC42*, which may be important for mediating general cell movement (Fig. 11) (Yamao et al., 2015; Sepúlveda-Ramírez et al., 2018).

Another mesodermally-derived tissue that is regulated by miR-1 is the larval skeleton. To understand how miR-1 may be regulating PMC development and skeletogenesis, we identified miR-1 to directly suppress *Ets1/2*, *Tbr*, and *VegfR7* of the PMC GRN, and *Notch*, *Nodal*, *Bmp2/4*, and *Wnt1* of signaling pathways (Fig. 9). *Ets1/2* and *Tbr* are critical for PMC specification and function. *Ets1/2* is an important modulator of MAPK pathway that is required for the specification of PMCs and their ability to undergo EMT (Kurokawa et al., 1999; Röttinger et al., 2004). Additionally, *Tbr* plays an essential role in specification of the skeletogenic mesoderm and formation of the larval skeleton where *Tbr* knockdown resulted in a complete loss of skeleton (Oliveri et al., 2002). The percentage of PMCs undergoing EMT is significantly and consistently less than the control (Fig. 6Ai,6Bi). Additionally, we observed both miR-1 perturbed embryos have a decrease of 3-4 PMCs compared to control which would likely not have detrimental effects (Fig. 6Aii,6Bii). Thus, miR-1's regulation of *Ets1/2* and *Tbr* may potentially contribute to the decreased PMCs and EMT defect in miR-1 perturbed embryos. Moreover, the delay in PMC ingress could be due to miR-1's potential regulation of *G-cadherin* and *Snail*, both of which have predicted miR-1 binding sites. *Snail* represses the transcription of cadherin in order for PMCs to detach from basal lamina and ingress into the blastocoel (Wu and McClay, 2007). The delay in PMC ingress could potentially affect PMC patterning by disrupting the time and distance-sensitive interaction between *VegfR10*-expressing PMCs and the *Vegf3* ligand expressed in the ectoderm, as *Vegf3* expression becomes restricted to the Veg1 ectoderm by 30 hpf (Li et al., 2014). Additionally, the function of another Vegf receptor, *VegfR7* is not well understood; however we have previously found that blocking miR-31's direct suppression of *VegfR7* resulted in mislocalized PMCs, indicating *VegfR7*'s potential role in PMC patterning (Stepicheva and Song,

2015). Thus, miR-1's direct suppression of *Ets1/2*, *Tbr*, and *VegfR7* may affect not only PMC ingression but also affect PMC patterning.

A possible mechanism for miR-1 perturbation-induced ectopic branching can be explained by our observation that the PMCs of miR-1 perturbed larvae migrate off the main skeletal elements and continue to form syncytial cables (filopodia) (Fig. 8C). Since PMCs are solely responsible for the formation of the larval skeleton (Ettensohn and McClay, 1986), these PMCs in miR-1 perturbed larvae appear to be mispatterned to areas where we observed ectopic skeletal elements (Figs. 7D, 8C). Additionally, ectopic branching can also be explained by miR-1's direct suppression of *Nodal* (Fig. 9B). Of note is that miR-1 mimic-injected embryos have the characteristic radialized morphology in the vegetal view, similar to *Nodal* morphant-induced morphology (Figs. 10Aii, 10Bii) (Duboc et al., 2010). Also, although the level of *Nodal* transcripts was not greatly altered in miR-1 mimic-injected embryos, we observed a >3-fold decrease of *Nodal* target, *Not1* (Li et al., 2012). This result indicates that miR-1 mimic-injected embryos have decreased *Nodal* protein, resulting in decreased *Not1* transcripts (Fig. 11B). miR-1's direct suppression of *Nodal* could potentially explain the skeletal defects in both contexts of loss-of-function and gain-of-function of miR-1 (Figs. 7,9), since knockdown or overexpression of *Nodal* results in ectopic skeletal branching (Duboc et al., 2004). Additionally, *Nodal* and *Bmp2/4* restrict *Fgfa* expression to the PMC VLC (Guss and Ettensohn, 1997; Röttinger et al., 2008). Our results indicate that miR-1 inhibition led to increased *Nodal*, which may lead to a >2-fold decrease of *Fgfa*; while miR-1 mimic-injections may lead to decreased *Nodal* which may lead to a >2-fold increase of *Fgfa* (Fig. 11B). During the gastrula stage, *Fgfa* is expressed in ectoderm near the regions of the tri-radiate spicule rudiment branches which form the BRs and the PORs (Horstadius, 1973; Röttinger et al., 2008). Inhibition of *Fgfa* prevents skeletogenesis, whereas overexpression of *Fgfa* resulted in supernumerary tri-radiates leading to ectopic skeletal branching. Increased *Fgfa* in miR-1 mimic-injected embryos could in part explain the multiple spicules in gastrulae and ectopic BR and POR branches observed in larvae (Fig. 7C,D). Interestingly, *Bmp2/4* knockdown also result in larvae with multiple skeletal rods and ectopic branching (Duboc et al., 2004). Since results indicate that miR-1 does not directly regulate *Bmp2/4*, any changes in *Bmp2/4* spatial expression and/or transcript levels are likely due to miR-1's suppression of *Nodal* which activates *Bmp2/4* (Duboc et al., 2004). Thus, we propose that mispatterned PMCs and aberrant skeletal

branching in miR-1 mimic-injected embryos may attribute to miR-1's repression of *Nodal* to increase *Fgfa* (Duboc et al., 2010) and miR-1's indirect regulation of *Bmp2/4*.

To further elucidate the molecular mechanism of how miR-1 regulates PMC patterning, we examined the spatial expression domains and transcript levels of *Vegf3*, *Wnt1*, *Nodal*, *Not1*, and *Bmp2/4* (Figs. 10,11). Both *Nodal* and *Bmp2/4* signaling pattern the PMCs by restricting *Vegf3* expression to the two lateral ectodermal domains and posterior ventral corners where the PMC clusters reside to form the skeletal rudiments within the border ectoderm-dorsal ventral margin (BE-DVM) intersection (Fig. 12A) (Duboc et al., 2010; McIntyre et al., 2013; Layous, 2020). In the ventral ectoderm, *Nodal* activates the expression of itself, *Not1*, *Bmp2/4* and *Vegf3* at 8-9 hpf in the ventral ectoderm (Lapraz et al., 2009; Li et al., 2012). Subsequently, *Not1* restricts *Vegf3* expression from the ventral domain by 27 hpf (Li et al., 2012), while *Bmp2/4* protein translocates to the dorsal side by late blastula to eliminate *Wnt1* from the dorsal posterior cells to induce dorsal fates (Lapraz et al., 2009; Wei et al., 2012). *Wnt1* then restricts *Nodal* from the posterior ventral region (Wei et al., 2012), and indirectly activates *Vegf3* (Sampilo et al., 2021). In miR-1 inhibitor-injected gastrulae, both the lateral and vegetal expression of *Vegf3* was significantly decreased (Fig. 10A). In contrast, miR-1 mimic-injected gastrulae had no change in lateral *Vegf3* expression (Fig. 10Ai), but vegetal *Vegf3* expression had significantly expanded into both the VE and DE domains (Fig. 10Aii). The expanded *Vegf3* expression domain may contribute to ectopic supernumerary skeletal branching (Duloquin et al., 2007; Morgulis et al., 2019). Previous studies in vertebrates have shown miR-1 to directly target *VegfA* (Stahlhut et al., 2012; Zhu et al., 2018). In the sea urchin, a partial *Vegf3* transcript contains one predicted miR-1 binding site; however, the sequence data on *SpVegf3* 3'UTR is incomplete and difficult to clone. Thus, although the change in *Vegf3* expression domain may be due to miR-1's direct suppression, our results indicate that the expression of *Vegf3* in the ventral-dorsal axis may be a result of miR-1's direct regulation of *Nodal*. Additionally, a previous study has shown that a loss of *Bmp2/4* resulted in the position of the PMC ring to shift towards the animal pole and a radialized the embryo (Angerer et al., 2000; Layous, 2020). Interestingly, in miR-1 mimic-injected gastrulae, we observed mispatterned PMCs that migrated near the animal pole (Fig. 8B), decreased *Bmp2/4* expression domain, and radialized embryos (Fig. 10Bii), indicating that these defects are likely due to miR-1's suppression of *Nodal*. Animal pole PMCs that ectopically migrated from the DVCs may become PMCs that give rise to ectopic branches off the ALRs (Sun and Etensohn, 2014).

The expanded expression domain of *Wnt1* in miR-1 mimic-injected embryos may restrict the expression domain of *Nodal*, leading to expansion of *Vegf3* expression domain. Although *Wnt1* is directly suppressed by miR-1, *Wnt1* can activate its own transcription and is part of highly cross-regulated positive feedback circuitry (Cui et al., 2014; Sampilo et al., 2021). The expanded expression domain of *Wnt1* in miR-1 mimic-injected gastrulae is likely due to decreased *Bmp2/4* expression domain via miR-1's direct suppression of *Nodal* (Figs. 9, 10Bii, 11B). The changes we observed in the spatial expressions of *Vegf3*, *Nodal*, *Not1*, *Bmp2/4*, and *Wnt1* in miR-1 mimic-injected embryos may all contribute to PMC mispatterning (Figs. 8B, 8Cii, 10Aii, 10Bii). Overall, miR-1 mimic-injected embryos have reminiscent larval branching defects as *Nodal* and *Bmp2/4* knockdown embryos (Duboc et al., 2004), and *Vegf3* and *Fgfa* overexpressing embryos (Fig. 7D) (Duloquin et al., 2007; Röttinger et al., 2008).

Previously, we identified that miR-31 in the sea urchin regulates skeletogenesis by directly suppressing *Eve* and *Wnt1* (Sampilo et al., 2021). Depletion of miR-31 resulted in expanded vegetal spatial expression of *Vegf3* (Stepicheva and Song, 2015; Sampilo et al., 2021), similar to miR-1 mimic-injections. miR-1 directly suppresses genes *Ets1/2*, *Tbr*, *VegfR7* and *Wnt1*, of which *Ets1/2* and *Tbr* are downstream of miR-31 targets *Pmar1* and *Eve* (Stepicheva and Song, 2015; Sampilo et al., 2021). Thus, both miR-31 and miR-1 target critical components within the PMC GRN and co-regulate skeletogenesis (Fig. 12B).

Overall, we identified miR-1 to regulate not only mesodermally-derived structures, but also mediate the development of the endodermal gut and ectodermally-derived nervous system. This study identifies novel functions of miR-1, by identifying its direct targets and revealing miR-1 as a multifunctional miRNA that regulates structures derived from all three germ layers in a developing embryo.

## Figure Legends

**Figure 1. miR-1 is dynamically expressed throughout development.** (A) Schematics depicting various cell fates in various developmental stages of the sea urchin embryo. (B) *FISH* was used to detect miR-1 at various developmental stages and counterstained with DAPI against DNA (blue). miR-1 is expressed perinuclearly in the 32-cell stage embryo (arrow). miR-1 has increased expression during gastrula stage and is enriched in the larval ciliary band and gut. Larva: N=13, 3 biological replicates. Scale bar = 50  $\mu$ m. (C) miR-1 expression is measured by relative miRNA RT-qPCR at various developmental stages. Red dashed lines indicate 2-fold expression difference. Blue circles represent datum points. 3 biological replicates.

**Figure 2. Perturbation of miR-1 results in gut defects.** (A) miR-1 inhibition resulted in undetectable level of miR-1 compared to the control. N=20 (Bi-iii) Width of MG and width of HG of larvae were measured ( $W_1$  and  $W_2$ ), and their ratios to overall width of larvae ( $T_w$ ) were calculated. The length of MG was measured ( $L_1$ ) and calculated as the ratio to overall height of larvae ( $T_H$ ). Compared to control, miR-1 inhibition resulted in shorter MGs while miR-1 mimic-injected larvae have much wider and longer MGs and HGs. (Biv) Control and miR-1 perturbed larvae were assessed for alkaline phosphatase activity (blue stain). (C) miR-1 perturbed larvae exhibit significantly less contractions of the foregut and the midgut compared to control. 2 biological replicates. (D) Blastulae were hybridized with *Krl* and *FoxA* RNA *in situ* probes. *Krl* is expressed in the Veg1 endoderm (orange cells in schematic). The spatial expression domains (red arrows) and anterior shift (blue lines) of *Krl* were measured on both sides of each embryo. *FoxA* is expressed in the Veg2 endoderm (yellow cells in schematic), which are positioned at an angle (red dashed lines). Student's t-test. 2 biological replicates. Scale bar = 50  $\mu$ m.

**Figure 3. Perturbation of miR-1 results in circumpharyngeal muscle morphological defects.** Circumpharyngeal muscles were labeled with Phalloidin to detect F-actin. Z-stack of confocal images were taken to count muscle fiber rings. Compared to control, miR-1 perturbed larvae exhibited less or a complete loss of F-actin, in addition to irregular F-actin morphology (boxed areas). miR-1 inhibitor induced defects were rescued by co-injection of miR-1 mimic. Colored asterisks correspond to phenotypes in the bar graph. 4 biological replicates. Student's t-test. Scale



bar = 50  $\mu$ m.

**Figure 4. Perturbation of miR-1 results in neuronal specification defects.** (A) Larvae were immunolabeled with Serotonin antibody (green) and counterstained with DAPI for DNA (blue). 4 biological replicates. (B) Larvae were immunolabeled with SynB antibody (green) and counterstained with DAPI (blue). (C) Blastulae were incubated with *FoxQ2* RNA probe. Compared to control, the expression domain of *FoxQ2* was significantly increased in miR-1 inhibitor-injected embryos, whereas miR-1 mimic-injections resulted in significantly decreased *FoxQ2* expression domain. 2 biological replicates. Student's t-test. Scale bar = 50  $\mu$ m.

**Figure 5. Inhibition of miR-1 results in PC morphology changes.** (Ai) Snapshots of PCs in live larvae are depicted. Scale bar = 20  $\mu$ m. (Aii) N=number of pigment cells observed in 7 embryos for each condition. Arrows indicate cells that lack filopodial extensions. 2 biological replicates. (Aiii) Compared to control, miR-1 mimic-injected embryos have fewer PCs, based on counting them in brightfield (BF) or with Sp1 immunolabeling. Student's t-test. Scale bar = 50  $\mu$ m. 2 biological replicates. (Aiv) Sp1 antibody was used to detect PCs. (B) FISH was used to measure the vegetal spatial expression of BC TF *Ese* and PC marker *Pks1* during blastula stage, demarcated by the yellow dashed lines. Student's t-test. 2 biological replicates.

**Figure 6. Perturbation of miR-1 induced a delay in PMC ingress.** Control and miR-1 perturbed embryos were collected at various times during PMC ingress. (A) *VegfR10*-positive PMCs were counted through a series of Z-stack images to examine cell specification and EMT. Compared to control, miR-1 perturbed blastulae had less PMCs. Student's t-test. (B) The percentage of “ingressed, round” PMCs from each embryo were calculated from the total of *VegfR10*-expressing PMCs (Sampilo et al., 2021). 3 biological replicates. Cochran-Mantel-Haenszel test. 3 biological replicates. Scale bar = 50  $\mu$ m.

**Figure 7. Perturbation of miR-1 results in shortening of the DVCs and abnormal skeletal branching.** (A) miR-1 inhibitor was injected at various concentrations, resulting in decreased DVC length in a dose-dependent manner. Shortened DVCs can be rescued by co-injection of miR-1 inhibitor with the miR-1 mimic. Arrows indicate the length of DVCs. (B) miR-1 mimic-injected

embryos had a dose-dependent decrease of DVCs. N is the total number of spicules examined. Student's t-test. Scale bar = 50  $\mu$ m. (C) Perturbation of miR-1 resulted in various skeletal defects (arrows), such as abnormal tri-radiate protrusions, scattered skeletal elements, and supernumerary tri-radiates. Scale bar = 20  $\mu$ m. (D) miR-1 inhibitor-injected larvae exhibited ectopic BR branching, lack of BR convergence, and underdeveloped larvae. miR-1 mimic-injected embryos were underdeveloped and exhibited severe defects of supernumerary branching (arrows) off the PORs, ALRs, and/or BRs in a dose-dependent manner. 3 biological replicates. Scale = 50  $\mu$ m.

**Figure 8. Perturbation of miR-1 results in ectopic PMC patterning.** Gastrulae were immunolabeled with 1D5 PMC antibody (McClay et al., 1983) or hybridized with the *VegfR10* RNA probe. (Ai-ii) PMCs in miR-1 inhibitor-injected gastrulae exhibit less anterior migration (arrows) compared to the control that was able to be rescued by co-injection of miR-1 mimic. *VegfR10*-expressing cells also exhibit clustering and lack of anterior migration compared to control, similar to immunolabeling with the 1D5 antibody. Student's t-test. 3 biological replicates. (Bi-ii) miR-1 mimic-injected gastrulae exhibited scattered or clustered PMCs, and PMCs that have migrated near animal pole (arrows). (C) Larvae were immunolabeled with 1D5 antibody and counterstained with DAPI (blue). (Ci) Compared to control, miR-1 inhibitor-injected larvae exhibited ectopic branching off the BR (arrow). (Cii) miR-1 mimic-injections resulted in severe PMC patterning defects, correlating to abnormal skeletal branching. Scale = 50  $\mu$ m.

**Figure 9. miR-1 targets multiple components skeletogenic GRN and signaling pathways.** (A) miR-1 directly suppresses *Ets1/2*, *Tbr*, *VegfR7*, *Notch*, *Nodal* and *Wnt1*. Student's t-test. (B) Schematic of simplified PMC GRN is shown. PMCs are specified by the Wnt/ $\beta$ -catenin signaling pathway which activates the transcriptional repressor *Pmar1*, leading to the activation of skeletogenic TFs *Ets1/2*, *Tbr*, *Alx1*, *Dri* and *Erg*, as well as other endodermally and mesodermally-derived TFs (not shown). In the ectoderm (ECT), Wnt/ $\beta$ -catenin signaling activates *Eve* which in turn activates *Wnt1*. *Nodal* in the ventral ectoderm activates BMP signaling to restrict *Wnt1* to the posterior-ventral side while *Wnt1* prevents *Nodal* expression in the posterior region. *Nodal* activates *Not1*, and *Not1* represses *Vegf3* in the ventral ectoderm, thus restricting *Vegf3* expression to the two lateral ectodermal domains. Validated miR-1 targets are highlighted in orange.

**Figure 10. Perturbation of miR-1 results in ectopic expression domains.** (A) Gastrulae were hybridized with *Vegf3*, *Wnt1*, *Nodal*, *Not1* and *Bmp2/4* RNA probes. (Ai) The lateral expression domain of *Vegf3* (red dashed lines) decreased in miR-1 inhibited gastrulae, while its ventral *Vegf3* expression domain decreased from the ventral ectoderm (VE; orange region in the schematic). (Aii) The lateral expression of *Vegf3* in miR-1 mimic-injections resulted in no change, while the vegetal expression domain of *Vegf3* in the border ectoderm (BE) was significantly expanded into the VE as well as into the dorsal ectoderm (DE; green region in the schematic). (Bi) In miR-1 inhibitor-injected gastrulae, *Nodal* and *Not1* vegetal expression domains expanded while the expression domains of *Bmp2/4* and *Wnt1* were not altered. (Bii) In miR-1 mimic-injections, *Nodal*, *Not1* and *Bmp2/4* vegetal expression domain decreased, while *Wnt1* and *Vegf3* expanded. N is the number of domains measured. Student's t-test. 2-3 biological replicates. Scale = 50  $\mu$ m.

**Figure 11. miR-1 regulates transcripts that encode key endodermal, ectodermal, and mesodermal TFs.** (A) The expression levels of key TFs important in specification of the endoderm, ectoderm, and mesoderm were collected at the mesenchyme blastula stage and assessed with qPCR. (B) The expression levels of key transcripts encoding factors important for PMC specification and patterning were collected at the mesenchyme blastula stage and assessed with qPCR.

**Figure 12. miR-1 and miR-31 regulate the expression of PMC GRN.** (A) Nodal signaling activates its own transcription within the ventral ectoderm, which in turn activates *Bmp2/4* and *Not1*. *Bmp2/4* ligand is translocated to the dorsal side of the embryo to activate signaling in the dorsal PMCs. *Bmp2/4* indirectly restricts *Vegf3* ventrally by repressing *Wnt1* that is upstream of *Vegf3* expression in the BE-DVM (border ectoderm dorsal-ventral margin). Nodal activation of *Not1* restricts *Vegf3* expression to the two lateral ectodermal domains. BE-DVM intersection is where the PMC clusters reside to form the skeletal rudiments (Duboc et al., 2010; McIntyre et al., 2013; Layous, 2020). (B) miR-1 directly suppresses transcripts (orange) such as *Ets1/2*, *Tbr* and *Notch* which are downstream of miR-31 target, *Pmar1* (purple). Both miR-1 and miR-31 directly suppress *VegfR7* and *Wnt1* (Stepicheva and Song, 2015; Sampilo et al., 2021). miR-1 and miR-31 are critical for proper PMC development.

## Acknowledgements

The authors would like to thank David McClay (Duke University) for his kind gift of 1D5 antibody and Gary Wessel (Brown University) for the SynB antibody. This work is funded by University of Delaware Graduate Fellowship to NFS. NSF CAREER (IOS 1553338) and MCB 2103453 to JLS and NIH NIGMS P20GM103446.

## Supplementary Figures

**Fig. S1 miR-1 is evolutionarily conserved.** Alignment of mature miR-1 sequences in several metazoan species is shown. Red nucleotides indicate the highly conserved miR-1 seed sequence. miR-1 in protostomes is shown in blue and deuterostomes in purple. Yellow indicates variable nucleotides. miR-1 sequences were obtained from miRBase (Kozomara and Griffiths-Jones, 2014) and aligned with Clustal Omega Multiple Sequence Alignment program (Sievers et al., 2011).

**Movie 1. Gut contractions in control embryos.** Live embryos were collected 5 dpf and recorded. Average of contractions was analyzed within 4 min. Scale bar = 20  $\mu$ m.

**Movie 2. Gut contractions in miR-1 inhibitor-injected embryos.** Live embryos were collected 5 dpf and recorded. Average of contractions was analyzed within 4 min. Scale bar = 20  $\mu$ m.

**Movie 3. Gut contractions in miR-1 mimic-injected embryos.** Live embryos were collected 5 dpf and recorded. Average of contractions was analyzed within 4 min. Scale bar = 20  $\mu$ m.

**Movie 4. Pigment granules of control-injected larvae travel linearly.** Live embryos were collected 5 dpf and recorded. Pigment granules within the PCs of control larvae travel in a linear fashion that occasionally bifurcate into two filopodial extensions. Scale bar = 20  $\mu$ m.

**Movie 5. Pigment cells in miR-1 inhibited larvae move with blebbing.** Live embryos were collected 5 dpf and recorded. In miR-1 inhibitor-injected larvae, pigment granules within immunocytes migrate in clumped or rounded manner. Scale bar = 20  $\mu$ m.

**Movie 6. Pigment granules of miR-1 mimic-injected larvae exhibit scattered and multifurcated extensions.** Live embryos were collected 5 dpf and recorded. In miR-1 mimic-injected larvae, PCs exhibit scattered pigment granules that form multifurcated filopodial extensions that travel in multiple directions. Scale bar = 20  $\mu\text{m}$ .

**Table S1. Primers for 3'UTR cloning and modifications of miRNA seed sequences of target genes for site-directed mutagenesis**

| Gene                                                 | (5' to 3')<br>3'UTR Primers and Mutagenesis Primers                                                                                                                                                                                                                                                                                                                                                                                                                                                                                                                                                                                                                                                                                                                                                                                                                                                                                                                                                                                   |
|------------------------------------------------------|---------------------------------------------------------------------------------------------------------------------------------------------------------------------------------------------------------------------------------------------------------------------------------------------------------------------------------------------------------------------------------------------------------------------------------------------------------------------------------------------------------------------------------------------------------------------------------------------------------------------------------------------------------------------------------------------------------------------------------------------------------------------------------------------------------------------------------------------------------------------------------------------------------------------------------------------------------------------------------------------------------------------------------------|
| <i>Bmp2/4</i><br>(SPU_000669)                        | 3'UTR_F_SacI <sup>2</sup> : CGTGAGCTCAACCTTCCTCAATACGCTCA<br>3'UTR_R_NotI <sup>2</sup> : TACGCGGCCGCGGGCAGTCATGATTCGTTTT                                                                                                                                                                                                                                                                                                                                                                                                                                                                                                                                                                                                                                                                                                                                                                                                                                                                                                              |
|                                                      | Mutagenesis<br>miR-1: <b>ACATTCC</b> → <b>ACGTCCC</b> (Mismatch site at +2 position) <sup>1</sup><br>F(+2) <sup>1</sup> : CGAGGCTGAGCTCA <b>ACGTCCC</b> TCAATACGCTCAAG<br>R(+2) <sup>1</sup> : CTTGAGCGTATTGAG <b>GGACGT</b> TGAGCTCAGCCTCG                                                                                                                                                                                                                                                                                                                                                                                                                                                                                                                                                                                                                                                                                                                                                                                           |
| <i>Dri</i><br>(SPU_005718)                           | 3'UTR_F_XhoI <sup>2</sup> : CAGCCTCGAGGGTGCTCCGTCCGAACATA<br>3'UTR_R_NotI <sup>2</sup> : TGCTGCGGCCGCTTCCATCTTGTAATTATATCTG                                                                                                                                                                                                                                                                                                                                                                                                                                                                                                                                                                                                                                                                                                                                                                                                                                                                                                           |
|                                                      | Mutagenesis<br>miR-1: <b>ACATTCC</b> → <b>ACGTACC</b> (Complete sites at +337 and +857) <sup>1</sup><br>F(+337) <sup>1</sup> : AAAAAACCCAGATGATTTCTTGTGT <b>ACGTACC</b> ATAATTATATAGAATCGTATCCAAC<br>R(+337) <sup>1</sup> : GTTGATACGATTCTATATAATTAT <b>GGTACGT</b> ACACAAGAAATCATCTGGGTTTTTT<br>F(+857) <sup>1</sup> : GGGATAGTCTCACGTATTA <b>ACGTACC</b> TTTTTACCATGCAGTATT<br>R(+857) <sup>1</sup> : AATACTGCATGGTAAAAG <b>GGTACGT</b> TAATACGTGAGACTATCCC                                                                                                                                                                                                                                                                                                                                                                                                                                                                                                                                                                         |
| <i>Ets1/2</i><br>(SPU_002874)                        | 3'UTR_F_XhoI <sup>2</sup> : CATTCTCGAGAGAATCCC CGATGTGCAC<br>3'UTR_R_NotI <sup>2</sup> : TGCTGCGGCCGCCACAATTTATTTTTTTTACCAGTC                                                                                                                                                                                                                                                                                                                                                                                                                                                                                                                                                                                                                                                                                                                                                                                                                                                                                                         |
|                                                      | Mutagenesis<br>miR-1: <b>ACATTCC</b> → <b>ACGTACC</b> (Complete site at +1065 position) <sup>1</sup><br>F(+1065) <sup>1</sup> : GATTTACATTCGTTAGAAGT <b>ACGTACC</b> AAAGTCGTCTGCATTGTACC<br>R(+1065) <sup>1</sup> : GGTACAAATGCAGACGACTTT <b>GGTACGT</b> ACTTCTAACGAATGTAATC                                                                                                                                                                                                                                                                                                                                                                                                                                                                                                                                                                                                                                                                                                                                                          |
| <i>IgTM</i><br>(*Sp-Scaffold<br>17: 88148-<br>92454) | Cloned using FragmentGENE (GENEWIZ/Azenta Life Sciences)                                                                                                                                                                                                                                                                                                                                                                                                                                                                                                                                                                                                                                                                                                                                                                                                                                                                                                                                                                              |
|                                                      | Mutagenesis<br>miR-1: ACATTTTC → ACGTCTC (Mismatched at +177 position) <sup>1</sup><br>miR-1: ATATTCC → ATGTCCC (Mismatched at +871 position) <sup>1</sup><br>miR-1: ACATTCT → ACGTCCCT (Truncated 3' seed site at +1428) <sup>1</sup><br>miR-1: ACTTTCC → ACGTCCC (Mismatched at +1742 position) <sup>1</sup><br>F(+177) <sup>1</sup> : GATGCTATCGAATGTTGTAAT <b>ACGTCTC</b> AAGCCATTATCTGCATTTTCCC<br>R(+177) <sup>1</sup> : GGGAAAATGCAGATAATGGCTT <b>GAGACGT</b> GATTACAACATTCGATAGCATC<br>F(+871) <sup>1</sup> : CTTTTTAAAATCATACCGTAAGAG <b>ATGTCCC</b> AATGACCGGGTAATAGTATATTT<br>R(+871) <sup>1</sup> : AAATATACTATTACCCCGTCAAT <b>GGGACAT</b> CTCTTACGGTATGATTTTAAAAAG<br>F(+1428) <sup>1</sup> : AGCATCTTTTATTTGTTTGGTT <b>ACGTCCCT</b> CGACGTTATCCCATACTTCAAG<br>R(+1428) <sup>1</sup> : CTTGAAGTATGGGATAACGTC <b>GAGACGT</b> AACCAAACAAATAAAAAGATGCT<br>F(+1742) <sup>1</sup> : CAGGGTATCACCCAAATTT <b>ACGTCCC</b> GAGTTATCAAACAGGTTGA<br>R(+1742) <sup>1</sup> : TCAACCTGTTTGATAACTC <b>GGGACGT</b> AAATTTGGGTGATACCCCTG |
| <i>Tbr</i><br>(SPU_025584)                           | 3'UTR_F_XhoI <sup>2</sup> : CAGCCTCGAGCTTTTAGTGGAATCGATTATTTG<br>3'UTR_R_NotI <sup>2</sup> : TGCTGCGGCCGCTGCAAATCATGCACCAACC                                                                                                                                                                                                                                                                                                                                                                                                                                                                                                                                                                                                                                                                                                                                                                                                                                                                                                          |
|                                                      | Mutagenesis<br>miR-1: <b>ACATTCC</b> → <b>ACGTACC</b> (Complete site at +1514 position) <sup>1</sup><br>F(+1514) <sup>1</sup> : CGTTCGTATTTCTGTACAGCT <b>ACGTACCA</b> ACGATGTTATTGCTTTTATTC<br>R(+1514) <sup>1</sup> : GAATAAAAGCAATAACATCGTT <b>GGTACGT</b> AGCTGTACAGAAATACGAAGCG                                                                                                                                                                                                                                                                                                                                                                                                                                                                                                                                                                                                                                                                                                                                                   |

|                               |                                                                                                                                                                                                                                                                                                                                                                                                                                                                                                                                                                                                                                                                                                   |
|-------------------------------|---------------------------------------------------------------------------------------------------------------------------------------------------------------------------------------------------------------------------------------------------------------------------------------------------------------------------------------------------------------------------------------------------------------------------------------------------------------------------------------------------------------------------------------------------------------------------------------------------------------------------------------------------------------------------------------------------|
| <i>Nodal</i><br>(SPU_011064)  | Cloned using FragmentGENE (GENEWIZ/Azenta Life Sciences)                                                                                                                                                                                                                                                                                                                                                                                                                                                                                                                                                                                                                                          |
|                               | <p>Mutagenesis<br/> miR-1: <b>ACATTC</b> → <b>ACGTCC</b> (Truncated 3' seed sites at +775, +865 and +1258 positions)<sup>1</sup><br/> F(+775)<sup>1</sup>: CACGAAAAAGCTGGTAAGT<b>ACGTCCT</b>CCTGTTTAAAGTAGGAAATCC<br/> R(+775)<sup>1</sup>: GGATTTCTACTTAAACAGG<b>AGGACGT</b>ACTTACCAGCTTTTTTCGTG<br/> F(+865)<sup>1</sup>: GAGAGGAGAAAGAGAAAG<b>ACGTCCT</b>AGATTGAGAGAGAGAGCG<br/> R(+865)<sup>1</sup>: CGCTCTCTCTCAATCT<b>AGGACGT</b>CTTTCTCTTTCTCCTCTC<br/> [Site +1258 cannot be mutated due to construct complexity]<br/> F(+1258)<sup>1</sup>: TTCGTTATGATGGACTACAT<b>ACGTCCT</b>TTTGCAGTTCCAAGTGCAAG<br/> R(+1258)<sup>1</sup>: CTTGCACTTGGAACTGCAAA<b>AGGACGT</b>ATGTAGTCCATCATAACGAA</p> |
| <i>Notch</i><br>(SPU_014131)  | <p>3' UTR_F_XhoI<sup>2</sup>: CAGTCTCGAGAAGCTTAAAACAACAAACATGCTTATTG<br/> 3' UTR_R_NotI<sup>2</sup>: TGCTGCGGCCGCGCGCCGCGACTTTCCAGGGGCATTTCT</p>                                                                                                                                                                                                                                                                                                                                                                                                                                                                                                                                                  |
|                               | <p>Mutagenesis<br/> miR-1: <b>ACATTC</b> → <b>ACGTCCC</b> (Complete sites at +306 and +453)<sup>1</sup><br/> F(+306)<sup>1</sup>: CAGATCCCTTTCTGAAACGC<b>ACGTCCC</b>AATGTTTGTTTGAC<br/> R(+306)<sup>1</sup>: GTCAAACAACATTGGAATGT<b>GGGACGT</b>AGGAAAGGGATCTG<br/> F(+453)<sup>1</sup>: AAAGTCTTCATGACAAG<b>ACGTCCC</b>ACATGGAGCACAGTCGA<br/> R(+453)<sup>1</sup>: TCGACTGTGCTCCATGT<b>GGGACGT</b>CTTGTTCATGAAGACTTT</p>                                                                                                                                                                                                                                                                          |
| <i>VegfR7</i><br>(SPU_021021) | <p>3' UTR_F_XhoI<sup>2</sup>: CAGTCTCGAGTGAGATATGAACAAATTA AAAAC<br/> 3' UTR_R_NotI<sup>2</sup>: TGCTGCGGCCGCGTTGGACACTGATCTCATAAAT</p>                                                                                                                                                                                                                                                                                                                                                                                                                                                                                                                                                           |
|                               | <p>Mutagenesis<br/> miR-1: <b>ACATTC</b> → <b>ACGTCCC</b> (Complete site at +1207 position)<sup>1</sup><br/> F: TATACTTGATCTTAATACAGAA<b>ACGTCCC</b>TGAATGATGTTAAGTGTGTGGG<br/> R: CCCACACACTTAACATCATT<b>AGGACGT</b>TTTCTGTATTAAGATCAAGTATA</p>                                                                                                                                                                                                                                                                                                                                                                                                                                                  |
| <i>Wnt1</i><br>(SPU_011756)   | <p>3' UTR_F_XhoI<sup>2</sup>: CGTCTCGAGTCAAGGGAACCATGTCTGGTT<br/> 3' UTR_R_NotI<sup>2</sup>: TACGCGGCCGCTTTCAAGTCTTTCTCGTTCAGC</p>                                                                                                                                                                                                                                                                                                                                                                                                                                                                                                                                                                |
|                               | <p>Mutagenesis<br/> miR-1: <b>ACATGC</b> → <b>ACGTCC</b> (Truncated 3' seed sites at +135 and +406)<sup>1</sup><br/> F(+135)<sup>1</sup>: CACATCAAAGGACTCGTGA<b>ACGTCC</b>GAAAGATATTCGAATCTCGA<br/> R(+135)<sup>1</sup>: TCGAGATTCGAAATATCTT<b>CGGACGT</b>TTCACGAGTCCTTTGATGTG<br/> F(+406)<sup>1</sup>: GGAAATCCATGTCACGT<b>ACGTCC</b>TGTTCAAGCAAATCGAAGA<br/> R(+406)<sup>1</sup>: TCTTCGATTTGCTTGAAC<b>AGGACGT</b>CACGTGACATGGATTCC</p>                                                                                                                                                                                                                                                        |

<sup>1</sup>We define position +1 as the first nucleotide after the stop codon.

<sup>2</sup>Restriction sites are underlined.

\*Sequence was annotated by Dr. Charles Ettensohn (Carnegie Mellon University)

**Table S2. Primers and enzymes used for *in situ* hybridization**

| Gene           | <i>In situ</i> Primers (5' to 3')                                                                              | RE <sup>2</sup> ; RNAP <sup>3</sup> |
|----------------|----------------------------------------------------------------------------------------------------------------|-------------------------------------|
| <i>Bmp2/4</i>  | Forward: CGGTCACATACAGAGGCTGA<br>Reverse_Sp6 <sup>1</sup> : <u>GATTTAGGTGACACTATAG</u> ACCCACAGCCTTCTACAACC    | <i>EcoRI</i><br>Sp6                 |
| <i>FoxA</i>    | Forward: TCCCACCCCAACCGACTCCG<br>Reverse: CGTCCCTTCGAAATGAATGGACAGGG                                           | <i>PstI</i><br>T7                   |
| <i>FoxQ2</i>   | Forward: TCTCTCCCTCAACGAGTGCT<br>Reverse: TCTTCAAGGTTAGCGGGATG                                                 | <i>BamHI</i><br>T7                  |
| <i>Krl</i>     | Forward: TCTTCACTCCTGTCCCTTGG<br>Reverse_Sp6 <sup>1</sup> : <u>GATTTAGGTGACACTATAG</u> GTGATCATT               | <i>EcoRI</i><br>Sp6                 |
| <i>Nodal</i>   | Forward: CGTGACTAGGCCTTTGCCT<br>Reverse_Sp6 <sup>1</sup> : <u>GATTTAGGTGACACTATAG</u> TAAGCATCTCTTGACTCGGT     | <i>EcoRI</i><br>Sp6                 |
| <i>Not1</i>    | Forward: ACGTCCCATCCTTTTCCTCT<br>Reverse_Sp6 <sup>1</sup> : <u>ATTTAGGTGACACTATAG</u> TGCATTCCAAAATTGCGATA     | <i>EcoRI</i><br>Sp6                 |
| <i>Vegf3</i>   | Forward: CGCGCAATTCACCTGATGTAT<br>Reverse_Sp6 <sup>1</sup> : <u>GATTTAGGTGACACTATAG</u> TGAAACCATCTCCTCCTCCA   | <i>EcoRI</i><br>Sp6                 |
| <i>VegfR10</i> | Forward: GACTTACGTTCACCTCTATACGT<br>Reverse_Sp6 <sup>1</sup> : <u>GATTTAGGTGACACTATAG</u> TGAAACCATCTCCTCCTCCA | <i>EcoRI</i><br>Sp6                 |
| <i>Wnt1</i>    | Forward: CGAAGAAAAGCATGCACAAA<br>Reverse_Sp6 <sup>1</sup> : <u>ATTTAGGTGACACTATAG</u> TCCTCAGCGTTTCCATTTTC     | <i>BamHI</i><br>Sp6                 |

<sup>1</sup>RNA polymerase site underlined

<sup>2</sup>RE = Restriction enzyme

<sup>3</sup>RNAP = RNA polymerase



**Table S3. Relative real-time, quantitative PCR Primers**

| <b>Gene</b>              | <b>Forward primer (5' to 3')</b> | <b>Reverse primer (5' to 3')</b> |
|--------------------------|----------------------------------|----------------------------------|
| <i>Bmp2/4</i>            | GACACACGGTTAGTCGACGT             | GATGGTCTGCCCCCTTGAGTC            |
| <i>CDC42</i>             | ACCAGAGATCACCCACCACT             | TTTGGCCATCCTCTCACCAG             |
| <i>Dri</i>               | GGTTTCCCTAGGCAAGGAAC             | GACAAGATGCTGCTGTTGGA             |
| <i>Ese</i>               | CCACTTGTGGGAGTTCATCC             | ATAGGTCATCTGCGGGTTGT             |
| <i>Ets1/2</i>            | AACCCTGTTATCCCTGCAGC             | GCTGATGATGTGCTGGCATG             |
| <i>Fgfa</i>              | GGATTTTCGCGTTGGACATCA            | GCTCTCTTACTCGCCGGTAT             |
| <i>FoxA</i>              | CCAACCGACTCCGTATCATC             | CGTAGCTGCTCATGCTGTGT             |
| <i>FoxQ2</i>             | TAACGAAAGGAGCTGGAGGA             | GCTTGCCGTCTCCTGTAATC             |
| <i>GataC (Gata1/2/3)</i> | TCGACATCAGCCATGAGTTC             | CCAGGATGGTGGAAATGAG              |
| <i>Onecut (Hnf6)</i>     | TGCAGCTTCTCTGCATACCA             | ACTCCAACATGCCTCCAAAC             |
| <i>IgTM</i>              | GCTACGTTTCCCTGGTGGAG             | TCACGCTACAGGTGAGTTCG             |
| <i>Kirrell</i>           | TCGCATCCCATTCTCTCAGC             | GACCCAGCAGCCCATGATAA             |
| <i>Krl (z13)</i>         | TCTTCACTCCTGTCCCTTGG             | GTGATCATTTCCAGCTGTCTG            |
| <i>Msp130</i>            | GCAATGGCTGAAGAGACACA             | GCCCACCGAACATGAATACT             |
| <i>MHC (MyosinX)</i>     | AGGAGCAGTCAGAGGAGAGA             | ACTGCACTTCCCTCTCTGCTT            |
| <i>Nodal</i>             | GACAACCCAAGCAACCACG              | CGCACTCCTGTACGATCATG             |
| <i>Not1</i>              | TCCATCCATCCCAGCTCTTC             | GGTGATGTTGGCGGATAACC             |
| <i>Notch</i>             | ACGGAGCCAAGCCTAAGAA              | TCGTCACAGGCAACGAATAA             |
| <i>p19</i>               | ATGGCAGAGGAGAGAAGGAA             | CTCTTGTGTCAGGTCTTGGA             |
| <i>p58A</i>              | CCTCACCAGCTCTCTTACC              | GTTGCGTCAGCTGTGAATGT             |
| <i>Pks1</i>              | GTAGGCAGCAGAGTCCTTGG             | GTAGGCAGCAGAGTCCTTGG             |
| <i>SM30</i>              | CTTTCCTCCAATGGCCACAG             | TCCAAAACGTCCTCCAGTGA             |
| <i>SM50</i>              | GGTGCTCTGGCTTCAGTTTC             | GTGCCATCTTCCAAAAGAA              |
| <i>Snail</i>             | CCACAGCATAACGACGCAGG             | CTCGGGTTTGTGGATAACTGG            |
| <i>SoxB1</i>             | TGTGAACGTCATGGCAAGTT             | GGGGTTGCTGTTGTTCTTGT             |
| <i>SoxC</i>              | GTACGTCGAGGAGGCAGAGA             | TGGCTTAGTGGTAGGCTTGG             |
| <i>Tbr</i>               | GGAACATTCGCCTTCCTTGT             | GAAGGCGTCGGTTTACCTCT             |
| <i>Tbx2/3</i>            | AGGAAATACATTGGCGCGAC             | ATCGTTACTGGTGGTGTGTA             |
| <i>Tropomyosin1</i>      | CCAGATGACAGAGCAACAGC             | GCTTCCAGTGACTTGCAGTT             |
| <i>Ubiquitin</i>         | CACAGGCAAGACCATCACAC             | GAGAGAGTGCAGCCATCCTC             |
| <i>Vegf3</i>             | TGCAAATGTTCCATTACGA              | GTTTCGTTGGTTATGCGTCA             |
| <i>Wnt1</i>              | TGCGATCTTATGTGCTGCTC             | GAAACGACGTGCACTCTTCA             |

## References

- Adomako-Ankomah, A. and Etensohn, C. A. (2011) 'P58-A and P58-B: novel proteins that mediate skeletogenesis in the sea urchin embryo', *Dev Biol* 353(1): 81-93.
- Adomako-Ankomah, A. and Etensohn, C. A. (2013) 'Growth factor-mediated mesodermal cell guidance and skeletogenesis during sea urchin gastrulation', *Development* 140(20): 4214-25.
- Adonin, L., Drozdov, A. and Barlev, N. A. (2020) 'Sea Urchin as a Universal Model for Studies of Gene Networks', *Front Genet* 11: 627259.
- Andrikou, C., Iovene, E., Rizzo, F., Oliveri, P. and Arnone, M. I. (2013) 'Myogenesis in the sea urchin embryo: the molecular fingerprint of the myoblast precursors', *Evodevo* 4(1): 33.
- Angerer, L. M. and Angerer, R. C. (2000) 'Animal-vegetal axis patterning mechanisms in the early sea urchin embryo', *Dev Biol* 218(1): 1-12.
- Angerer, L. M., Newman, L. A. and Angerer, R. C. (2005) 'SoxB1 downregulation in vegetal lineages of sea urchin embryos is achieved by both transcriptional repression and selective protein turnover', *Development* 132(5): 999-1008.
- Angerer, L. M., Oleksyn, D. W., Logan, C. Y., McClay, D. R., Dale, L. and Angerer, R. C. (2000) 'A BMP pathway regulates cell fate allocation along the sea urchin animal-vegetal embryonic axis', *Development* 127(5): 1105-14.
- Annunziata, R., Andrikou, C., Perillo, M., Cuomo, C. and Arnone, M. I. (2019) 'Development and evolution of gut structures: from molecules to function', *Cell Tissue Res* 377(3): 445-458.
- Annunziata, R., Perillo, M., Andrikou, C., Cole, A. G., Martinez, P. and Arnone, M. I. (2014) 'Pattern and process during sea urchin gut morphogenesis: the regulatory landscape', *Genesis* 52(3): 251-68.
- Arenas-Mena, C., Cameron, A. R. and Davidson, E. H. (2000) 'Spatial expression of Hox cluster genes in the ontogeny of a sea urchin', *Development* 127(21): 4631-43.
- Armstrong, N. and McClay, D. R. (1994) 'Skeletal pattern is specified autonomously by the primary mesenchyme cells in sea urchin embryos', *Dev Biol* 162(2): 329-38.
- Burke, R. D., Osborne, L., Wang, D., Murabe, N., Yaguchi, S. and Nakajima, Y. (2006) 'Neuron-specific expression of a synaptotagmin gene in the sea urchin *Strongylocentrotus purpuratus*', *J Comp Neurol* 496(2): 244-51.
- Chang, C. Y., Lui, T. N., Lin, J. W., Lin, Y. L., Hsing, C. H., Wang, J. J. and Chen, R. M. (2016) 'Roles of microRNA-1 in hypoxia-induced apoptotic insults to neuronal cells', *Arch Toxicol* 90(1): 191-202.
- Cheers, M. S. and Etensohn, C. A. (2004) 'Rapid microinjection of fertilized eggs', *Methods in cell biology* 74: 287-310.
- Cheers, M. S. and Etensohn, C. A. (2005) 'P16 is an essential regulator of skeletogenesis in the sea urchin embryo', *Dev Biol* 283(2): 384-96.
- Chhabra, S., Liu, L., Goh, R., Kong, X. and Warmflash, A. (2019) 'Dissecting the dynamics of signaling events in the BMP, WNT, and NODAL cascade during self-organized fate patterning in human gastruloids', *PLoS Biol* 17(10): e3000498.
- Conboy, I. M. and Rando, T. A. (2002) 'The regulation of Notch signaling controls satellite cell activation and cell fate determination in postnatal myogenesis', *Dev Cell* 3(3): 397-409.
- Cui, M., Siriwon, N., Li, E., Davidson, E. H. and Peter, I. S. (2014) 'Specific functions of the Wnt signaling system in gene regulatory networks throughout the early sea urchin embryo', *Proc Natl Acad Sci U S A* 111(47): E5029-38.

- Drawbridge, J. (2003) 'The color purple: analyzing alkaline phosphatase expression in experimentally manipulated sea urchin embryos in an undergraduate developmental biology course', *Int J Dev Biol* 47(2-3): 161-4.
- Duboc, V., Lapraz, F., Saudemont, A., Bessodes, N., Mekpoh, F., Haillet, E., Quirin, M. and Lepage, T. (2010) 'Nodal and BMP2/4 pattern the mesoderm and endoderm during development of the sea urchin embryo', *Development* 137(2): 223-35.
- Duboc, V., Röttinger, E., Besnardeau, L. and Lepage, T. (2004) 'Nodal and BMP2/4 signaling organizes the oral-aboral axis of the sea urchin embryo', *Dev Cell* 6(3): 397-410.
- Duboc, V., Röttinger, E., Lapraz, F., Besnardeau, L. and Lepage, T. (2005) 'Left-right asymmetry in the sea urchin embryo is regulated by nodal signaling on the right side', *Dev Cell* 9(1): 147-58.
- Duloquin, L., Lhomond, G. and Gache, C. (2007) 'Localized VEGF signaling from ectoderm to mesenchyme cells controls morphogenesis of the sea urchin embryo skeleton', *Development* 134(12): 2293-302.
- England, J., Granados-Riveron, J., Polo-Parada, L., Kuriakose, D., Moore, C., Brook, J. D., Rutland, C. S., Setchfield, K., Gell, C., Ghosh, T. K. et al. (2017) 'Tropomyosin 1: Multiple roles in the developing heart and in the formation of congenital heart defects', *J Mol Cell Cardiol* 106: 1-13.
- Ettensohn, C. A. and Dey, D. (2017) 'KirrelL, a member of the Ig-domain superfamily of adhesion proteins, is essential for fusion of primary mesenchyme cells in the sea urchin embryo', *Dev Biol* 421(2): 258-270.
- Ettensohn, C. A. and McClay, D. R. (1986) 'The regulation of primary mesenchyme cell migration in the sea urchin embryo: transplantations of cells and latex beads', *Dev Biol* 117(2): 380-91.
- Fromm, B., Billipp, T., Peck, L. E., Johansen, M., Tarver, J. E., King, B. L., Newcomb, J. M., Sempere, L. F., Flatmark, K., Hovig, E. et al. (2015) 'A Uniform System for the Annotation of Vertebrate microRNA Genes and the Evolution of the Human microRNAome', *Annu Rev Genet* 49: 213-42.
- Furtado, M. B., Solloway, M. J., Jones, V. J., Costa, M. W., Biben, C., Wolstein, O., Preis, J. I., Sparrow, D. B., Saga, Y., Dunwoodie, S. L. et al. (2008) 'BMP/SMAD1 signaling sets a threshold for the left/right pathway in lateral plate mesoderm and limits availability of SMAD4', *Genes Dev* 22(21): 3037-49.
- Garner, S., Zysk, I., Byrne, G., Kramer, M., Moller, D., Taylor, V. and Burke, R. D. (2016) 'Neurogenesis in sea urchin embryos and the diversity of deuterostome neurogenic mechanisms', *Development* 143(2): 286-97.
- Gregory, P. A., Bert, A. G., Paterson, E. L., Barry, S. C., Tsykin, A., Farshid, G., Vadas, M. A., Khew-Goodall, Y. and Goodall, G. J. (2008) 'The miR-200 family and miR-205 regulate epithelial to mesenchymal transition by targeting ZEB1 and SIP1', *Nat Cell Biol* 10(5): 593-601.
- Guss, K. A. and Ettensohn, C. A. (1997) 'Skeletal morphogenesis in the sea urchin embryo: regulation of primary mesenchyme gene expression and skeletal rod growth by ectoderm-derived cues', *Development* 124(10): 1899-908.
- Heidersbach, A., Saxby, C., Carver-Moore, K., Huang, Y., Ang, Y. S., de Jong, P. J., Ivey, K. N. and Srivastava, D. (2013) 'microRNA-1 regulates sarcomere formation and suppresses smooth muscle gene expression in the mammalian heart', *Elife* 2: e01323.
- Horstadius, S (1973) 'Sea urchin gametes: where, when, and how?', *Experimental Embryology of Echinoderms*: 25-28.

- Howard, E. W., Newman, L. A., Oleksyn, D. W., Angerer, R. C. and Angerer, L. M. (2001) 'SpKrl: a direct target of beta-catenin regulation required for endoderm differentiation in sea urchin embryos', *Development* 128(3): 365-75.
- Hua, C. B., Song, S. B., Ma, H. L. and Li, X. Z. (2019) 'MiR-1-5p is down-regulated in gallbladder carcinoma and suppresses cell proliferation, migration and invasion by targeting Notch2', *Pathol Res Pract* 215(1): 200-208.
- Jin, Y., Peng, Y., Lin, Z., Chen, Y. C., Wei, L., Hacker, T. A., Larsson, L. and Ge, Y. (2016) 'Comprehensive analysis of tropomyosin isoforms in skeletal muscles by top-down proteomics', *J Muscle Res Cell Motil* 37(1-2): 41-52.
- Komiya, Y. and Habas, R. (2008) 'Wnt signal transduction pathways', *Organogenesis* 4(2): 68-75.
- Kopan, R., Nye, J. S. and Weintraub, H. (1994) 'The intracellular domain of mouse Notch: a constitutively activated repressor of myogenesis directed at the basic helix-loop-helix region of MyoD', *Development* 120(9): 2385-96.
- Kozomara, A. and Griffiths-Jones, S. (2014) 'miRBase: annotating high confidence microRNAs using deep sequencing data', *Nucleic Acids Res* 42(Database issue): D68-73.
- Kumano, G. and Nishida, H. (1998) 'Maternal and zygotic expression of the endoderm-specific alkaline phosphatase gene in embryos of the ascidian, *Halocynthia roretzi*', *Dev Biol* 198(2): 245-52.
- Kurokawa, D., Kitajima, T., Mitsunaga-Nakatsubo, K., Amemiya, S., Shimada, H. and Akasaka, K. (1999) 'HpEts, an ets-related transcription factor implicated in primary mesenchyme cell differentiation in the sea urchin embryo', *Mech Dev* 80(1): 41-52.
- Lapraz, F., Besnardeau, L. and Lepage, T. (2009) 'Patterning of the dorsal-ventral axis in echinoderms: insights into the evolution of the BMP-chordin signaling network', *PLoS Biol* 7(11): e1000248.
- Layous, Majed (2020) The tolerance to hypoxia is defined by a time-sensitive response of the gene regulatory network in sea urchin embryos. in Lama Khalaily (ed.).
- Leaf, D. S., Anstrom, J. A., Chin, J. E., Harkey, M. A., Showman, R. M. and Raff, R. A. (1987) 'Antibodies to a fusion protein identify a cDNA clone encoding msp130, a primary mesenchyme-specific cell surface protein of the sea urchin embryo', *Dev Biol* 121(1): 29-40.
- Leguia, M., Conner, S., Berg, L. and Wessel, G. M. (2006) 'Synaptotagmin I is involved in the regulation of cortical granule exocytosis in the sea urchin', *Mol Reprod Dev* 73(7): 895-905.
- Li, E., Cui, M., Peter, I. S. and Davidson, E. H. (2014) 'Encoding regulatory state boundaries in the pregastrular oral ectoderm of the sea urchin embryo', *Proc Natl Acad Sci USA* 111(10): E906-13.
- Li, E., Materna, S. C. and Davidson, E. H. (2012) 'Direct and indirect control of oral ectoderm regulatory gene expression by Nodal signaling in the sea urchin embryo', *Dev Biol* 369(2): 377-85.
- Liu, W., Li, M., Chen, X., Zhu, S., Shi, H., Zhang, D., Cheng, C. and Li, B. (2018) 'MicroRNA-1 suppresses proliferation, migration and invasion by targeting Notch2 in esophageal squamous cell carcinoma', *Sci Rep* 8(1): 5183.
- Livingston, B. T., Killian, C. E., Wilt, F., Cameron, A., Landrum, M. J., Ermolaeva, O., Sapojnikov, V., Maglott, D. R., Buchanan, A. M. and Etensohn, C. A. (2006) 'A genome-wide analysis of biomineralization-related proteins in the sea urchin *Strongylocentrotus purpuratus*', *Dev Biol* 300(1): 335-48.
- Logan, C. Y., Miller, J. R., Ferkowicz, M. J. and McClay, D. R. (1999) 'Nuclear beta-catenin is required to specify vegetal cell fates in the sea urchin embryo', *Development* 126(2): 345-57.

- Lyons, D. C., Kaltenbach, S. L. and McClay, D. R. (2012) 'Morphogenesis in sea urchin embryos: linking cellular events to gene regulatory network states', *Wiley Interdiscip Rev Dev Biol* 1(2): 231-52.
- Mansfield, J. H., Harfe, B. D., Nissen, R., Obenaus, J., Srineel, J., Chaudhuri, A., Farzan-Kashani, R., Zuker, M., Pasquinelli, A. E., Ruvkun, G. et al. (2004) 'MicroRNA-responsive 'sensor' transgenes uncover Hox-like and other developmentally regulated patterns of vertebrate microRNA expression', *Nat Genet* 36(10): 1079-83.
- Martik, M. L., Lyons, D. C. and McClay, D. R. (2016) 'Developmental gene regulatory networks in sea urchins and what we can learn from them', *F1000Res* 5.
- Materna, S. C., Ransick, A., Li, E. and Davidson, E. H. (2013) 'Diversification of oral and aboral mesodermal regulatory states in pregastrular sea urchin embryos', *Dev Biol* 375(1): 92-104.
- McCarthy, J. J. (2011) 'The MyomiR network in skeletal muscle plasticity', *Exerc Sport Sci Rev* 39(3): 150-4.
- McClay, D. R., Cannon, G. W., Wessel, G. M., Fink, R. D. and Marchase, R. B. (1983) *Time, Space, and Pattern in Embryonic Development*.
- McClay, D. R., Miranda, E. and Feinberg, S. L. (2018) 'Neurogenesis in the sea urchin embryo is initiated uniquely in three domains', *Development* 145(21).
- McIntyre, D. C., Lyons, D. C., Martik, M. and McClay, D. R. (2014) 'Branching out: origins of the sea urchin larval skeleton in development and evolution', *Genesis* 52(3): 173-85.
- McIntyre, D. C., Seay, N. W., Croce, J. C. and McClay, D. R. (2013) 'Short-range Wnt5 signaling initiates specification of sea urchin posterior ectoderm', *Development* 140(24): 4881-9.
- Minokawa, T., Rast, J. P., Arenas-Mena, C., Franco, C. B. and Davidson, E. H. (2004) 'Expression patterns of four different regulatory genes that function during sea urchin development', *Gene Expr Patterns* 4(4): 449-56.
- Morgulis, M., Gildor, T., Roopin, M., Sher, N., Malik, A., Lalzar, M., Dines, M., Ben-Tabou de-Leon, S. and Khalaily, L. (2019) 'Possible cooption of a VEGF-driven tubulogenesis program for biomineralization in echinoderms', *Proc Natl Acad Sci U S A* 116(25): 12353-12362.
- Mu, L., Wang, J., Su, H. and Sanders, I. (2007) 'Adult human upper esophageal sphincter contains specialized muscle fibers expressing unusual myosin heavy chain isoforms', *J Histochem Cytochem* 55(3): 199-207.
- Niwa, H., Nakamura, A., Urata, M., Shirae-Kurabayashi, M., Kuraku, S., Russell, S. and Ohtsuka, S. (2016) 'The evolutionally-conserved function of group B1 Sox family members confers the unique role of Sox2 in mouse ES cells', *BMC Evol Biol* 16: 173.
- Oliveri, P., Carrick, D. M. and Davidson, E. H. (2002) 'A regulatory gene network that directs micromere specification in the sea urchin embryo', *Dev Biol* 246(1): 209-28.
- Oliveri, P., Walton, K. D., Davidson, E. H. and McClay, D. R. (2006) 'Repression of mesodermal fate by foxa, a key endoderm regulator of the sea urchin embryo', *Development* 133(21): 4173-81.
- Patani, R., Compston, A., Puddifoot, C. A., Wyllie, D. J., Hardingham, G. E., Allen, N. D. and Chandran, S. (2009) 'Activin/Nodal inhibition alone accelerates highly efficient neural conversion from human embryonic stem cells and imposes a caudal positional identity', *PLoS One* 4(10): e7327.
- Peterson, R. E. and McClay, D. R. (2005) 'A Fringe-modified Notch signal affects specification of mesoderm and endoderm in the sea urchin embryo', *Dev Biol* 282(1): 126-37.
- Range, R. C., Glenn, T. D., Miranda, E. and McClay, D. R. (2008) 'LvNumb works synergistically with Notch signaling to specify non-skeletal mesoderm cells in the sea urchin embryo', *Development* 135(14): 2445-54.

- Remsburg, C., Testa, M. and Song, J. L. (2021) 'Rab35 regulates skeletogenesis and gastrulation by facilitating actin remodeling and vesicular trafficking', *Cells Dev* 165.
- Rozen, S. and Skaletsky, H. (2000) 'Primer3 on the WWW for general users and for biologist programmers', *Methods in molecular biology* 132: 365-86.
- Röttinger, E., Besnardeau, L. and Lepage, T. (2004) 'A Raf/MEK/ERK signaling pathway is required for development of the sea urchin embryo micromere lineage through phosphorylation of the transcription factor Ets', *Development* 131(5): 1075-87.
- Röttinger, E., Saudemont, A., Duboc, V., Besnardeau, L., McClay, D. and Lepage, T. (2008) 'FGF signals guide migration of mesenchymal cells, control skeletal morphogenesis [corrected] and regulate gastrulation during sea urchin development', *Development* 135(2): 353-65.
- Sampilo, N. F., Stepicheva, N. A. and Song, J. L. (2021) 'microRNA-31 regulates skeletogenesis by direct suppression of Eve and Wnt1', *Dev Biol* 472: 98-114.
- Sampilo, N. F., Stepicheva, N. A., Zaidi, S. A. M., Wang, L., Wu, W., Wikramanayake, A. and Song, J. L. (2018) 'Inhibition of microRNA suppression of', *Development* 145(23).
- Schneider, C.A., Rasband, W.S., Eliceiri, K.W. (2012) NIH Image to ImageJ: 25 years of image analysis, vol. 9: Nature Methods.
- Schuster-Gossler, K., Cordes, R. and Gossler, A. (2007) 'Premature myogenic differentiation and depletion of progenitor cells cause severe muscle hypotrophy in Delta1 mutants', *Proc Natl Acad Sci U S A* 104(2): 537-42.
- Sepúlveda-Ramírez, S. P., Toledo-Jacobo, L., Henson, J. H. and Shuster, C. B. (2018) 'Cdc42 controls primary mesenchyme cell morphogenesis in the sea urchin embryo', *Dev Biol* 437(2): 140-151.
- Sievers, F., Wilm, A., Dineen, D., Gibson, T. J., Karplus, K., Li, W., Lopez, R., McWilliam, H., Remmert, M., Söding, J. et al. (2011) 'Fast, scalable generation of high-quality protein multiple sequence alignments using Clustal Omega', *Mol Syst Biol* 7: 539.
- Smith, J. R., Vallier, L., Lupo, G., Alexander, M., Harris, W. A. and Pedersen, R. A. (2008) 'Inhibition of Activin/Nodal signaling promotes specification of human embryonic stem cells into neuroectoderm', *Dev Biol* 313(1): 107-17.
- Smith, L Courtney, Rast, Jonathan P, Brockton, Virginia, Terwilliger, David P, Nair, Sham V, Buckley, Katherine M and Majeske, Audrey J (2006) 'The sea urchin immune system', *Invertebrate Survival Journal* 3(1): 25-39.
- Sokol, N. S. and Ambros, V. (2005) 'Mesodermally expressed Drosophila microRNA-1 is regulated by Twist and is required in muscles during larval growth', *Genes Dev* 19(19): 2343-54.
- Song, J. L., Stoeckius, M., Maaskola, J., Friedländer, M., Stepicheva, N., Juliano, C., Lebedeva, S., Thompson, W., Rajewsky, N. and Wessel, G. M. (2012) 'Select microRNAs are essential for early development in the sea urchin', *Dev Biol* 362(1): 104-13.
- Stahlhut, C., Suárez, Y., Lu, J., Mishima, Y. and Giraldez, A. J. (2012) 'miR-1 and miR-206 regulate angiogenesis by modulating VegfA expression in zebrafish', *Development* 139(23): 4356-64.
- Stepicheva, N. A. and Song, J. L. (2014) 'High throughput microinjections of sea urchin zygotes', *Journal of visualized experiments : JoVE*(83): e50841.
- Stepicheva, N. A. and Song, J. L. (2015) 'microRNA-31 modulates skeletal patterning in the sea urchin embryo', *Development* 142(21): 3769-80.
- Stepicheva, N., Nigam, P. A., Siddam, A. D., Peng, C. F. and Song, J. L. (2015) 'microRNAs regulate beta-catenin of the Wnt signaling pathway in early sea urchin development', *Developmental biology* 402(1): 127-41.

- Sun, Z. and Etensohn, C. A. (2014) 'Signal-dependent regulation of the sea urchin skeletogenic gene regulatory network', *Gene Expr Patterns* 16(2): 93-103.
- Sweet, H. C., Gehring, M. and Etensohn, C. A. (2002) 'LvDelta is a mesoderm-inducing signal in the sea urchin embryo and can endow blastomeres with organizer-like properties', *Development* 129(8): 1945-55.
- Sweet, H. C., Hodor, P. G. and Etensohn, C. A. (1999) 'The role of micromere signaling in Notch activation and mesoderm specification during sea urchin embryogenesis', *Development* 126(23): 5255-65.
- Takata, H. and Kominami, T. (2003) 'Behavior and differentiation process of pigment cells in a tropical sea urchin *Echinometra mathaei*', *Dev Growth Differ* 45(5-6): 473-83.
- Tokuoka, M., Setoguchi, C. and Kominami, T. (2002) 'Specification and differentiation processes of secondary mesenchyme-derived cells in embryos of the sea urchin *Hemicentrotus pulcherrimus*', *Dev Growth Differ* 44(3): 239-50.
- Varendi, K., Kumar, A., Härma, M. A. and Andressoo, J. O. (2014) 'miR-1, miR-10b, miR-155, and miR-191 are novel regulators of BDNF', *Cell Mol Life Sci* 71(22): 4443-56.
- Wei, Z., Range, R., Angerer, R. and Angerer, L. (2012) 'Axial patterning interactions in the sea urchin embryo: suppression of nodal by Wnt1 signaling', *Development* 139(9): 1662-9.
- Wei, Z., Yaguchi, J., Yaguchi, S., Angerer, R. C. and Angerer, L. M. (2009) 'The sea urchin animal pole domain is a Six3-dependent neurogenic patterning center', *Development* 136(7): 1179-89.
- Wienholds, E., Kloosterman, W. P., Miska, E., Alvarez-Saavedra, E., Berezikov, E., de Bruijn, E., Horvitz, H. R., Kauppinen, S. and Plasterk, R. H. (2005) 'MicroRNA expression in zebrafish embryonic development', *Science* 309(5732): 310-1.
- Wikramanayake, A. H., Huang, L. and Klein, W. H. (1998) 'beta-Catenin is essential for patterning the maternally specified animal-vegetal axis in the sea urchin embryo', *Proc Natl Acad Sci U S A* 95(16): 9343-8.
- Wilt, F. H. (2002) 'Biom mineralization of the spicules of sea urchin embryos', *Zool Sci* 19(3): 253-61.
- Wood, N. J., Mattiello, T., Rowe, M. L., Ward, L., Perillo, M., Arnone, M. I., Elphick, M. R. and Oliveri, P. (2018) 'Neuropeptidergic Systems in Pluteus Larvae of the Sea Urchin', *Front Endocrinol (Lausanne)* 9: 628.
- Wu, S. Y. and McClay, D. R. (2007) 'The Snail repressor is required for PMC ingression in the sea urchin embryo', *Development* 134(6): 1061-70.
- Yaguchi, J., Angerer, L. M., Inaba, K. and Yaguchi, S. (2012) 'Zinc finger homeobox is required for the differentiation of serotonergic neurons in the sea urchin embryo', *Dev Biol* 363(1): 74-83.
- Yaguchi, J., Takeda, N., Inaba, K. and Yaguchi, S. (2016) 'Cooperative Wnt-Nodal Signals Regulate the Patterning of Anterior Neuroectoderm', *PLoS Genet* 12(4): e1006001.
- Yaguchi, J. and Yaguchi, S. (2019) 'Evolution of nitric oxide regulation of gut function', *Proc Natl Acad Sci U S A* 116(12): 5607-5612.
- Yaguchi, J. and Yaguchi, S. (2021) 'Sea urchin larvae utilize light for regulating the pyloric opening', *BMC Biol* 19(1): 64.
- Yaguchi, S. and Katow, H. (2003) 'Expression of tryptophan 5-hydroxylase gene during sea urchin neurogenesis and role of serotonergic nervous system in larval behavior', *J Comp Neurol* 466(2): 219-29.
- Yaguchi, S., Yaguchi, J., Angerer, R. C. and Angerer, L. M. (2008) 'A Wnt-FoxQ2-nodal pathway links primary and secondary axis specification in sea urchin embryos', *Dev Cell* 14(1): 97-107.

- Yaguchi, S., Yaguchi, J. and Burke, R. D. (2007) 'Sp-Smad2/3 mediates patterning of neurogenic ectoderm by nodal in the sea urchin embryo', *Dev Biol* 302(2): 494-503.
- Yamao, M., Naoki, H., Kunida, K., Aoki, K., Matsuda, M. and Ishii, S. (2015) 'Distinct predictive performance of Rac1 and Cdc42 in cell migration', *Sci Rep* 5: 17527.
- Yamazaki, A., Kawabata, R., Shiomi, K., Tsuchimoto, J., Kiyomoto, M., Amemiya, S. and Yamaguchi, M. (2008) 'Krüppel-like is required for nonskeletogenic mesoderm specification in the sea urchin embryo', *Dev Biol* 314(2): 433-42.
- Yang, X., Pei, J., Kaeser-Woo, Y. J., Bacaj, T., Grishin, N. V. and Südhof, T. C. (2015) 'Evolutionary conservation of complexins: from choanoflagellates to mice', *EMBO Rep* 16(10): 1308-17.
- Yi, S., Yuan, Y., Chen, Q., Wang, X., Gong, L., Liu, J., Gu, X. and Li, S. (2016) 'Regulation of Schwann cell proliferation and migration by miR-1 targeting brain-derived neurotrophic factor after peripheral nerve injury', *Sci Rep* 6: 29121.
- Zhao, Y., Samal, E. and Srivastava, D. (2005) 'Serum response factor regulates a muscle-specific microRNA that targets Hand2 during cardiogenesis', *Nature* 436(7048): 214-20.
- Zheng, J., Yi, D., Liu, Y., Wang, M., Zhu, Y. and Shi, H. (2017) 'Long noncoding RNA UCA1 regulates neural stem cell differentiation by controlling miR-1/Hes1 expression', *Am J Transl Res* 9(8): 3696-3704.
- Zhu, D., Sun, Y., Zhang, D., Dong, M., Jiang, G., Zhang, X. and Zhou, J. (2018) 'miR-1 inhibits the progression of colon cancer by regulating the expression of vascular endothelial growth factor', *Oncol Rep* 40(2): 589-598.



A.

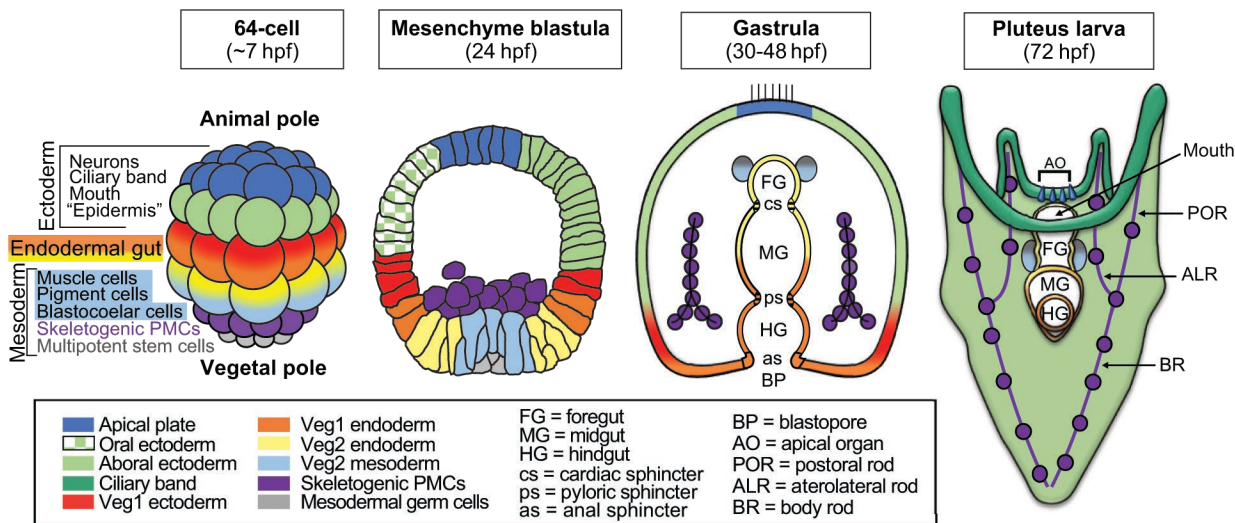

B.

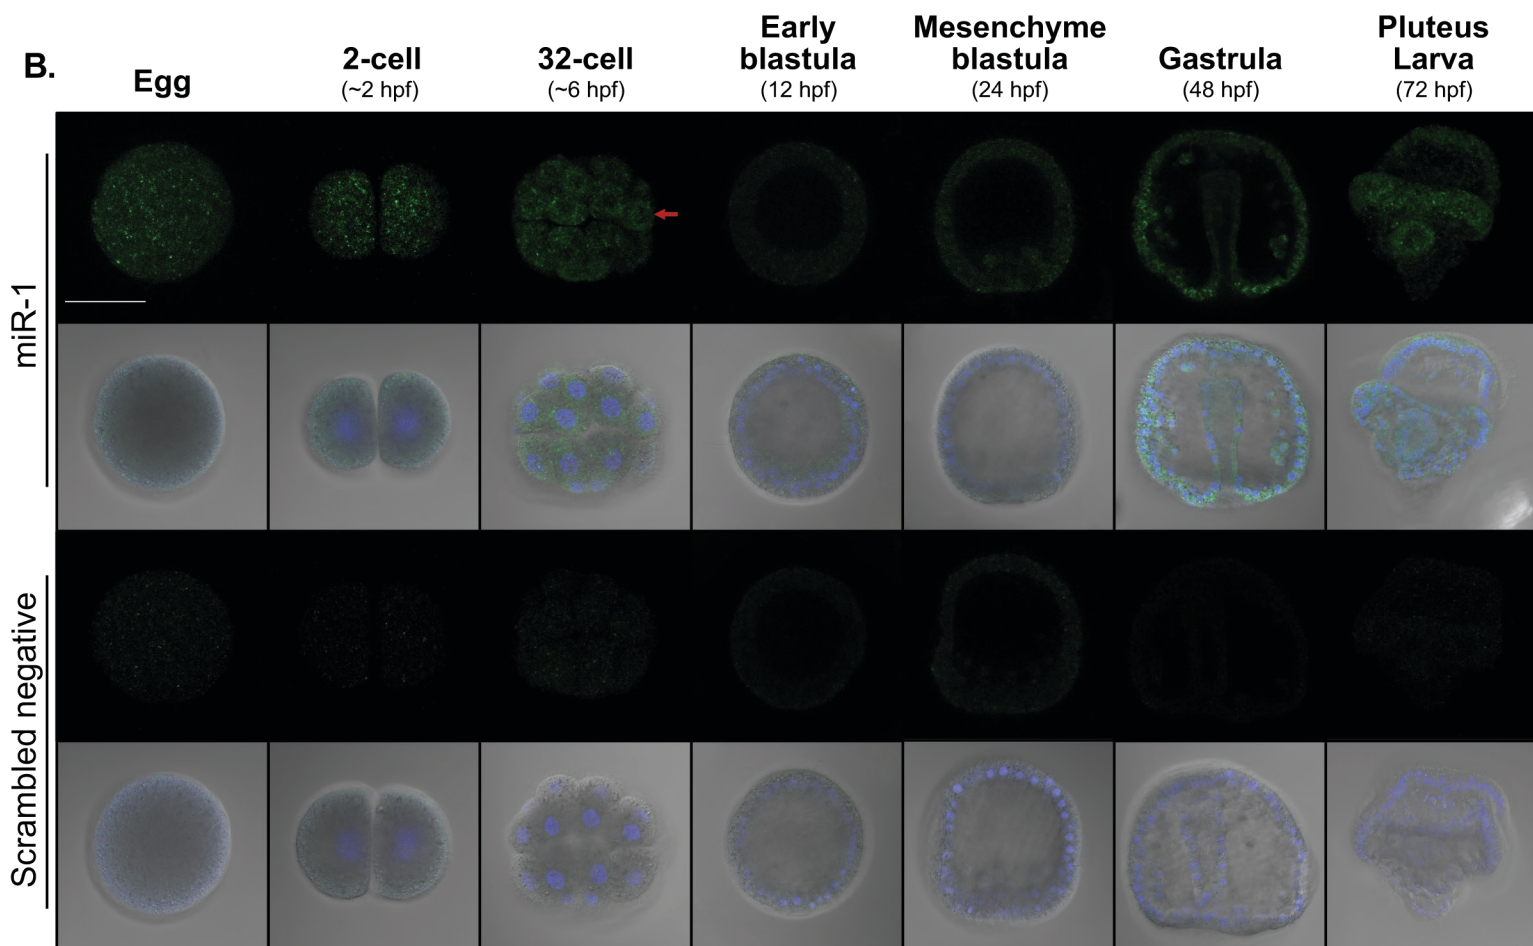

C.

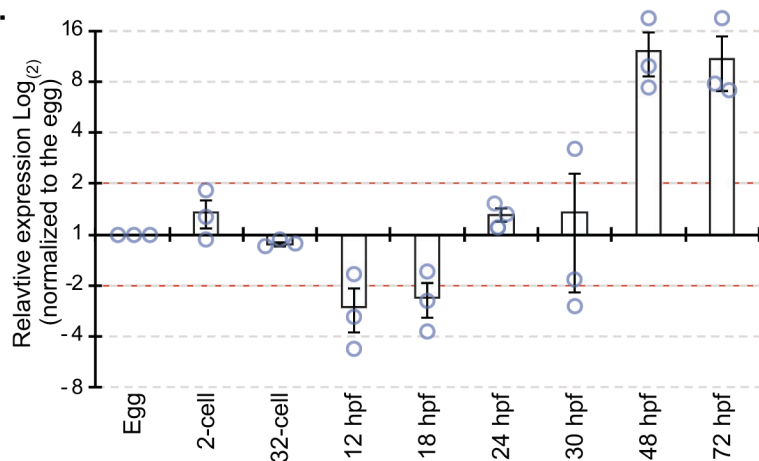

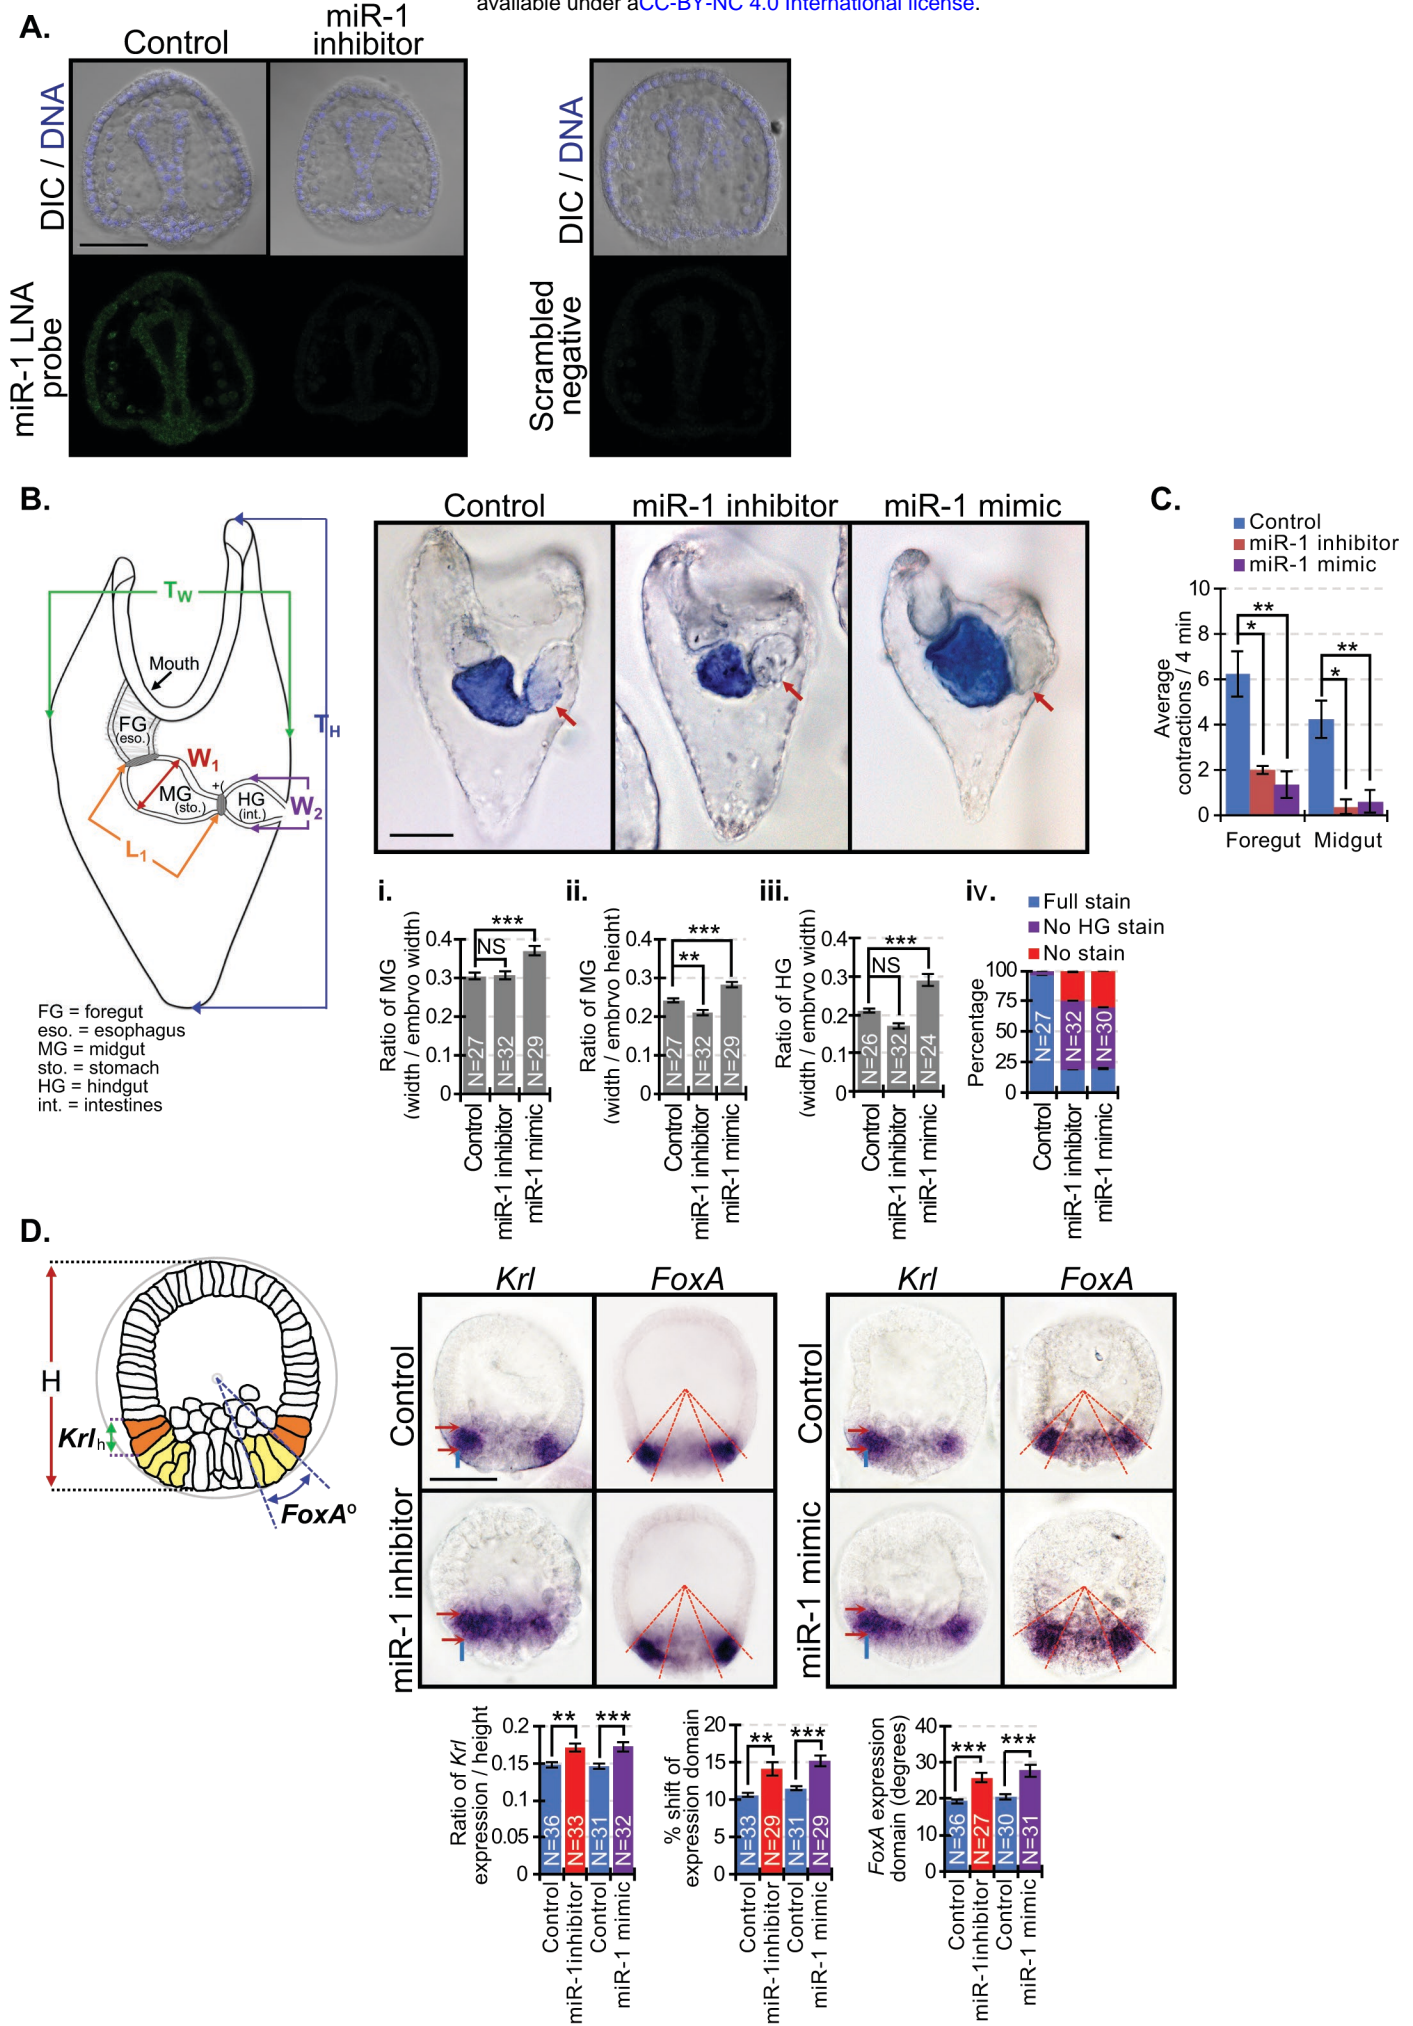

## Figure 3

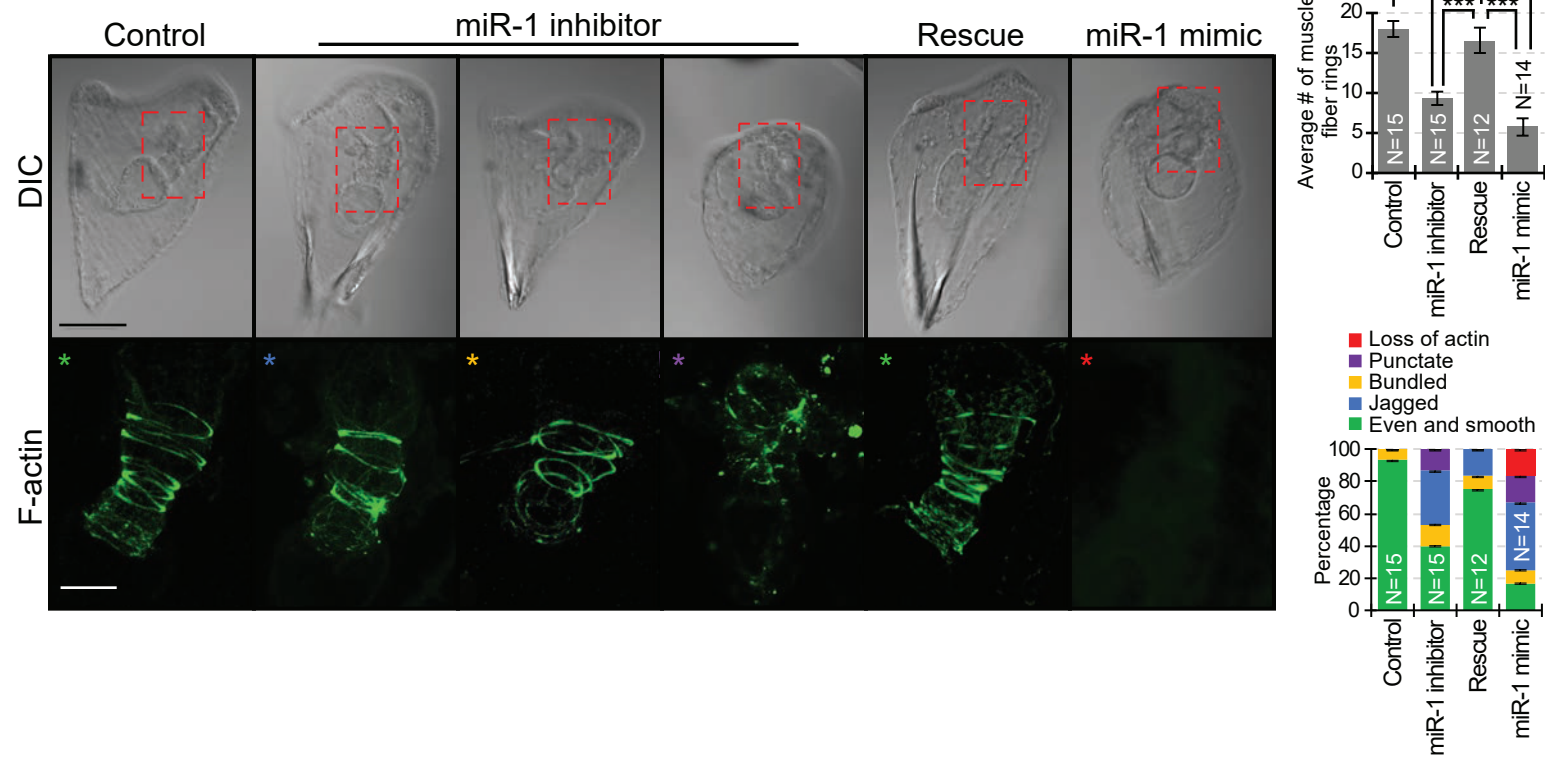

## Figure 4

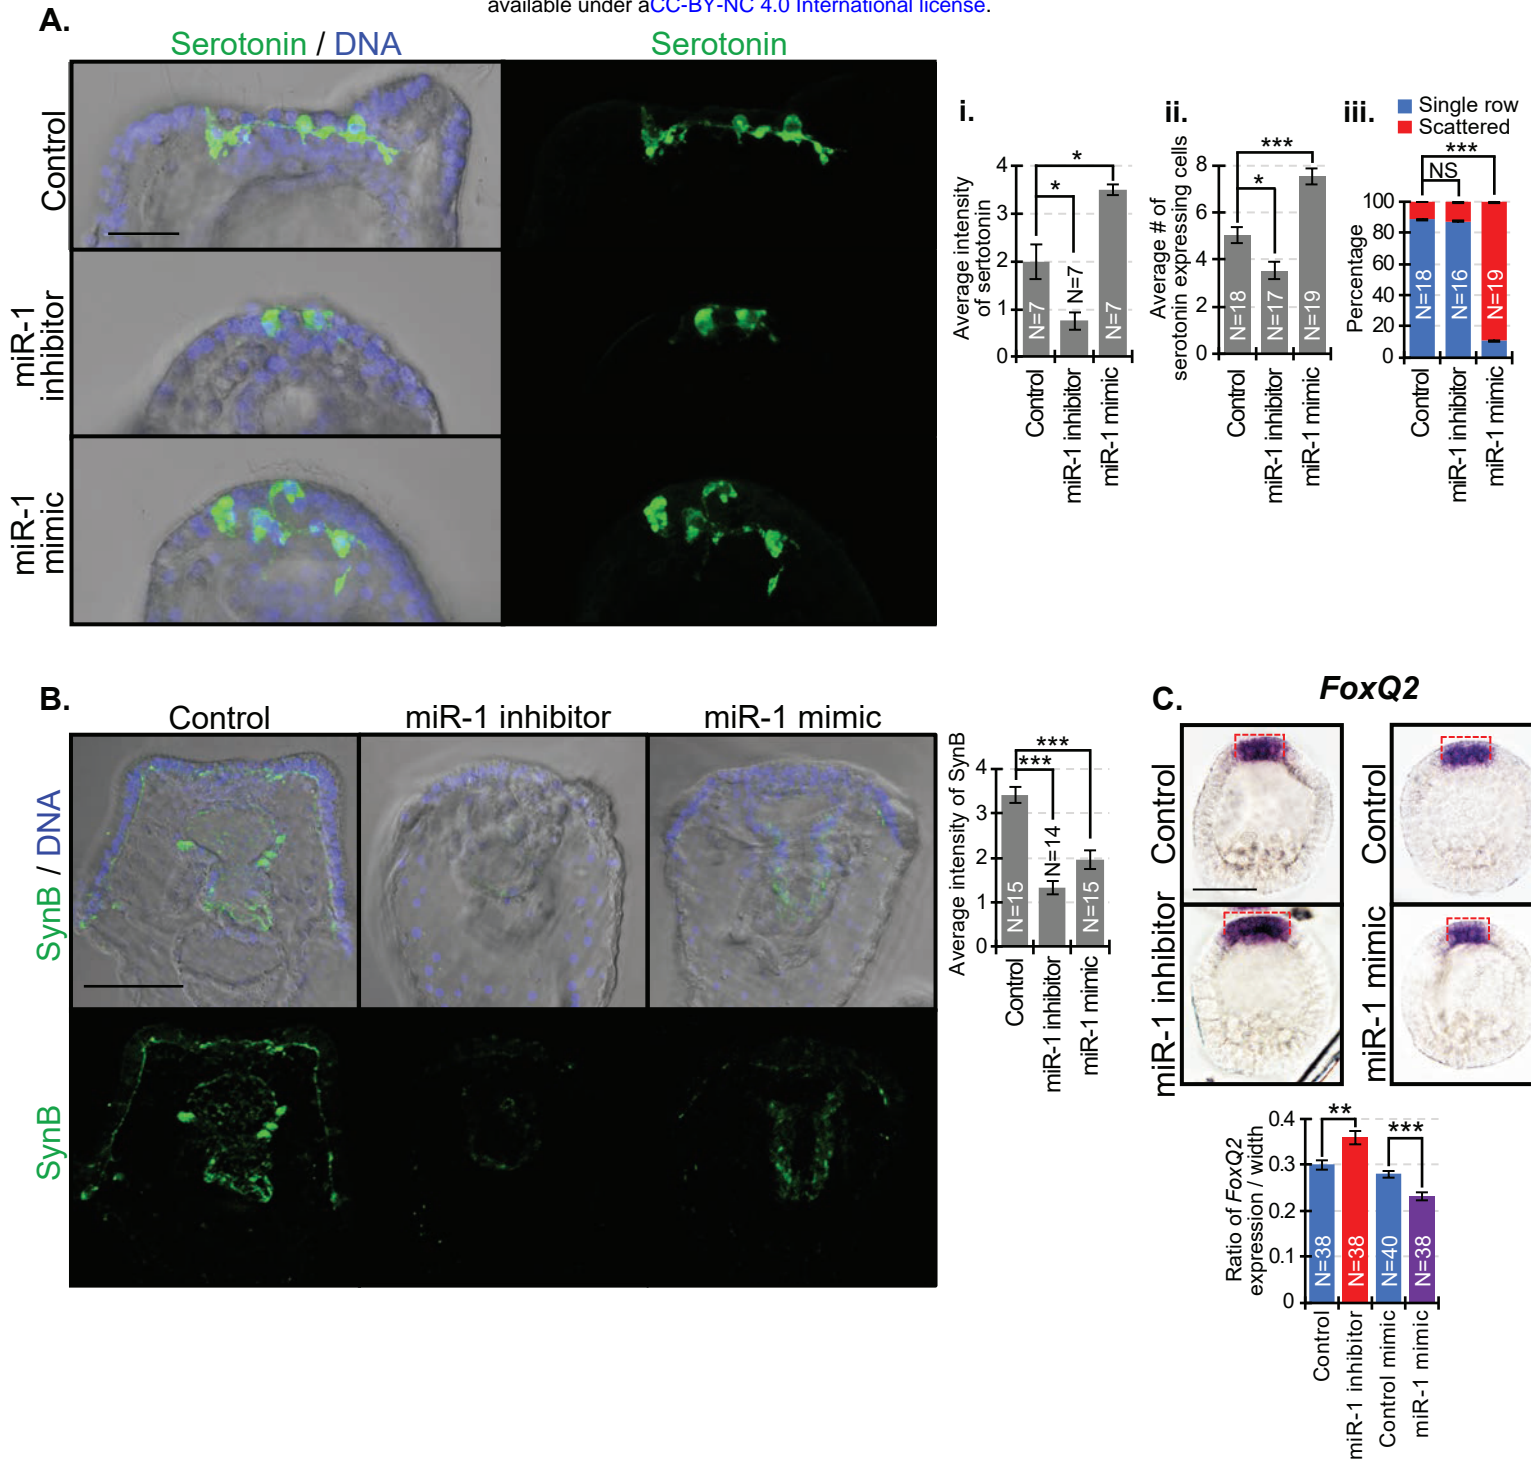

**Figure 5**

**A.**

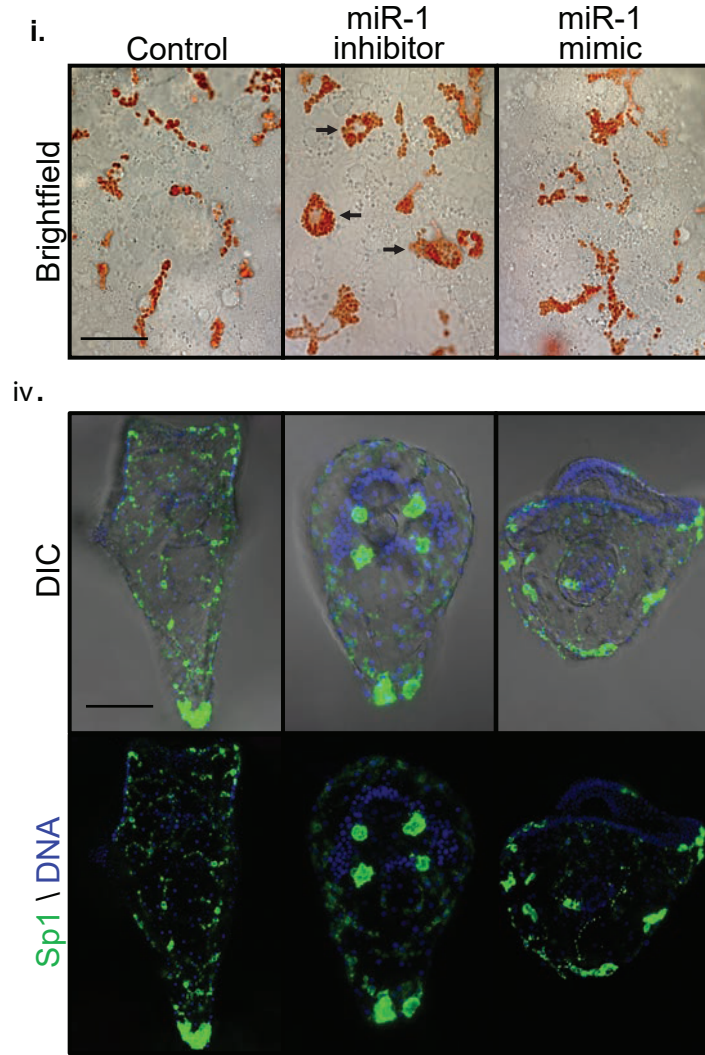

**ii.**

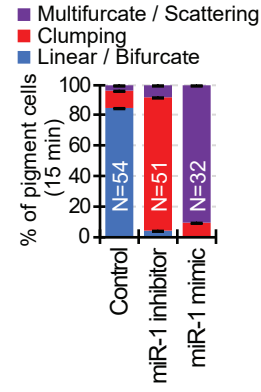

**iii.**

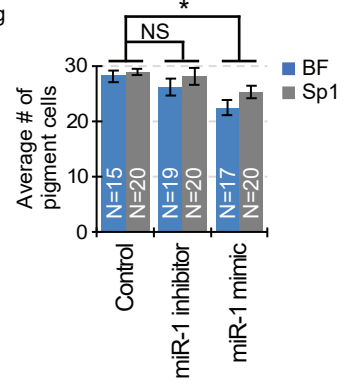

**B.**

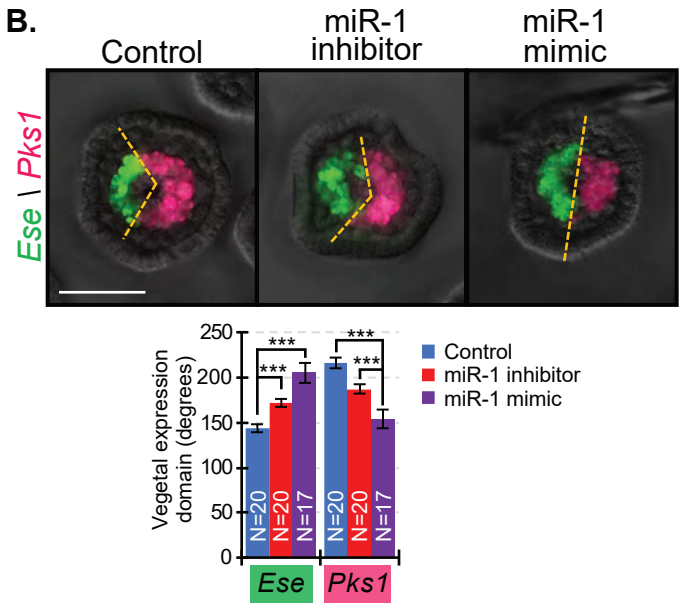

**Figure 6**

**VegfR10**

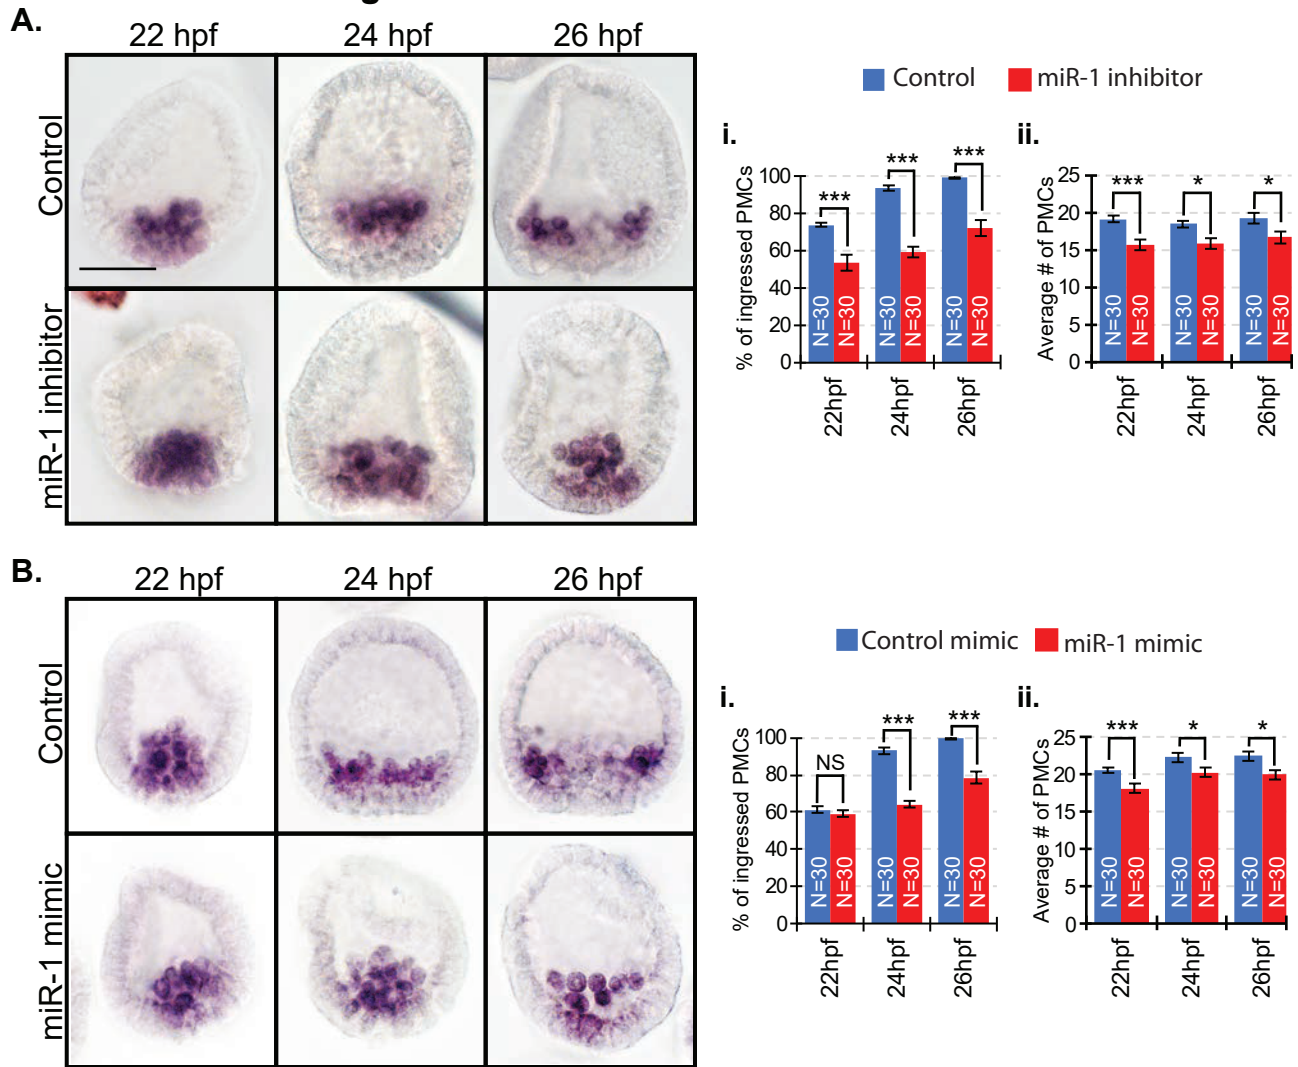

**Figure 7**

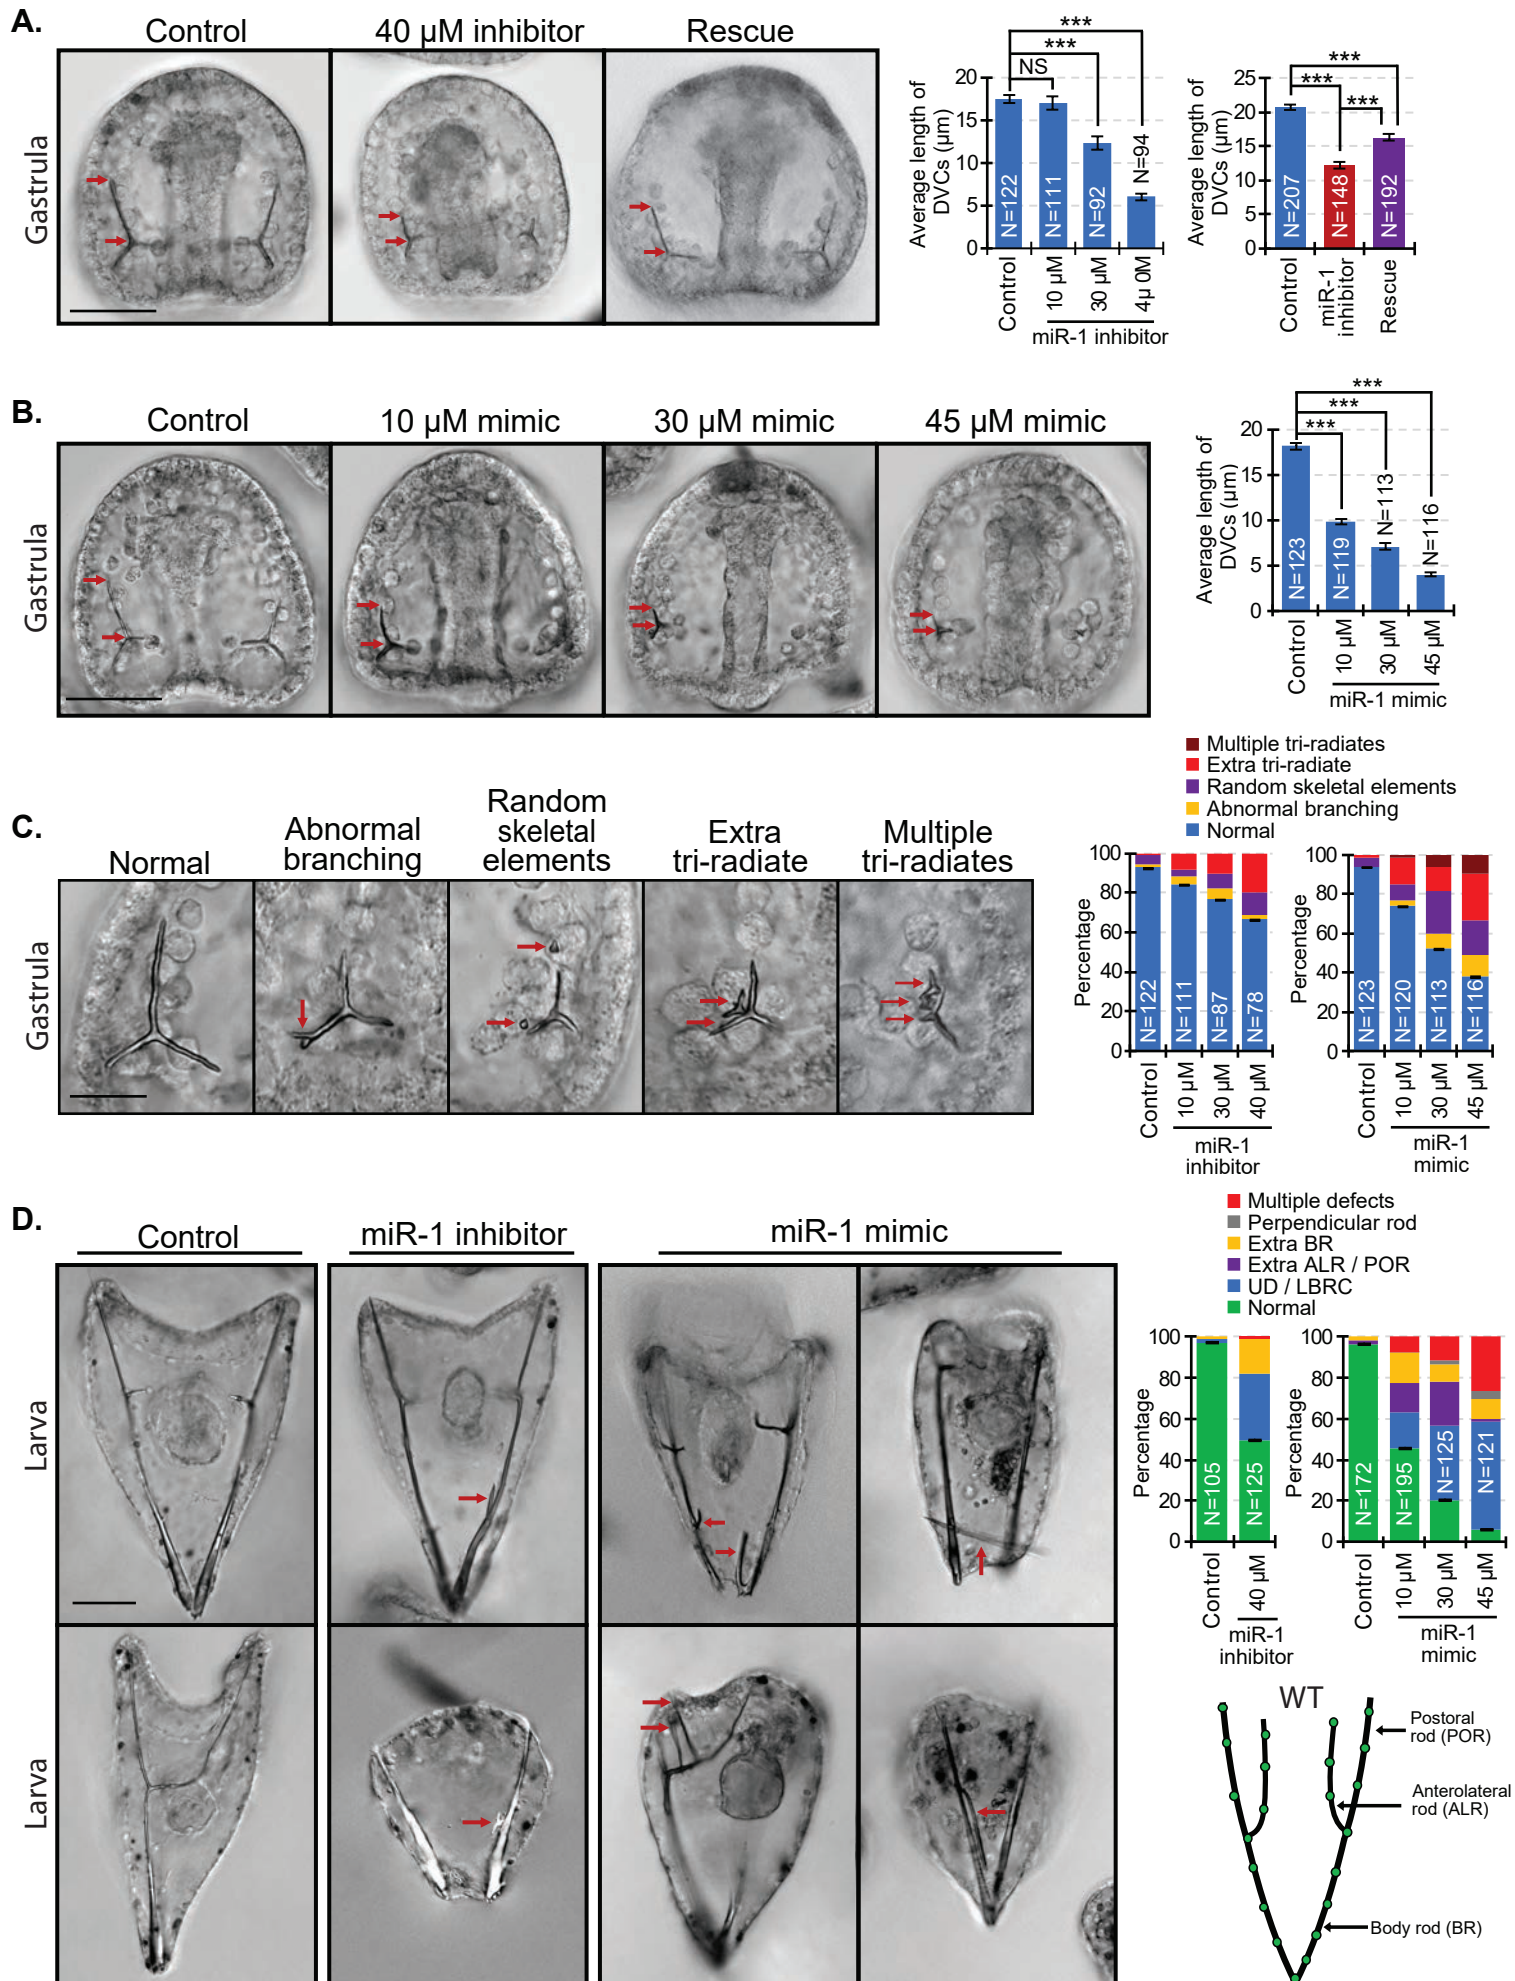

## Figure 3

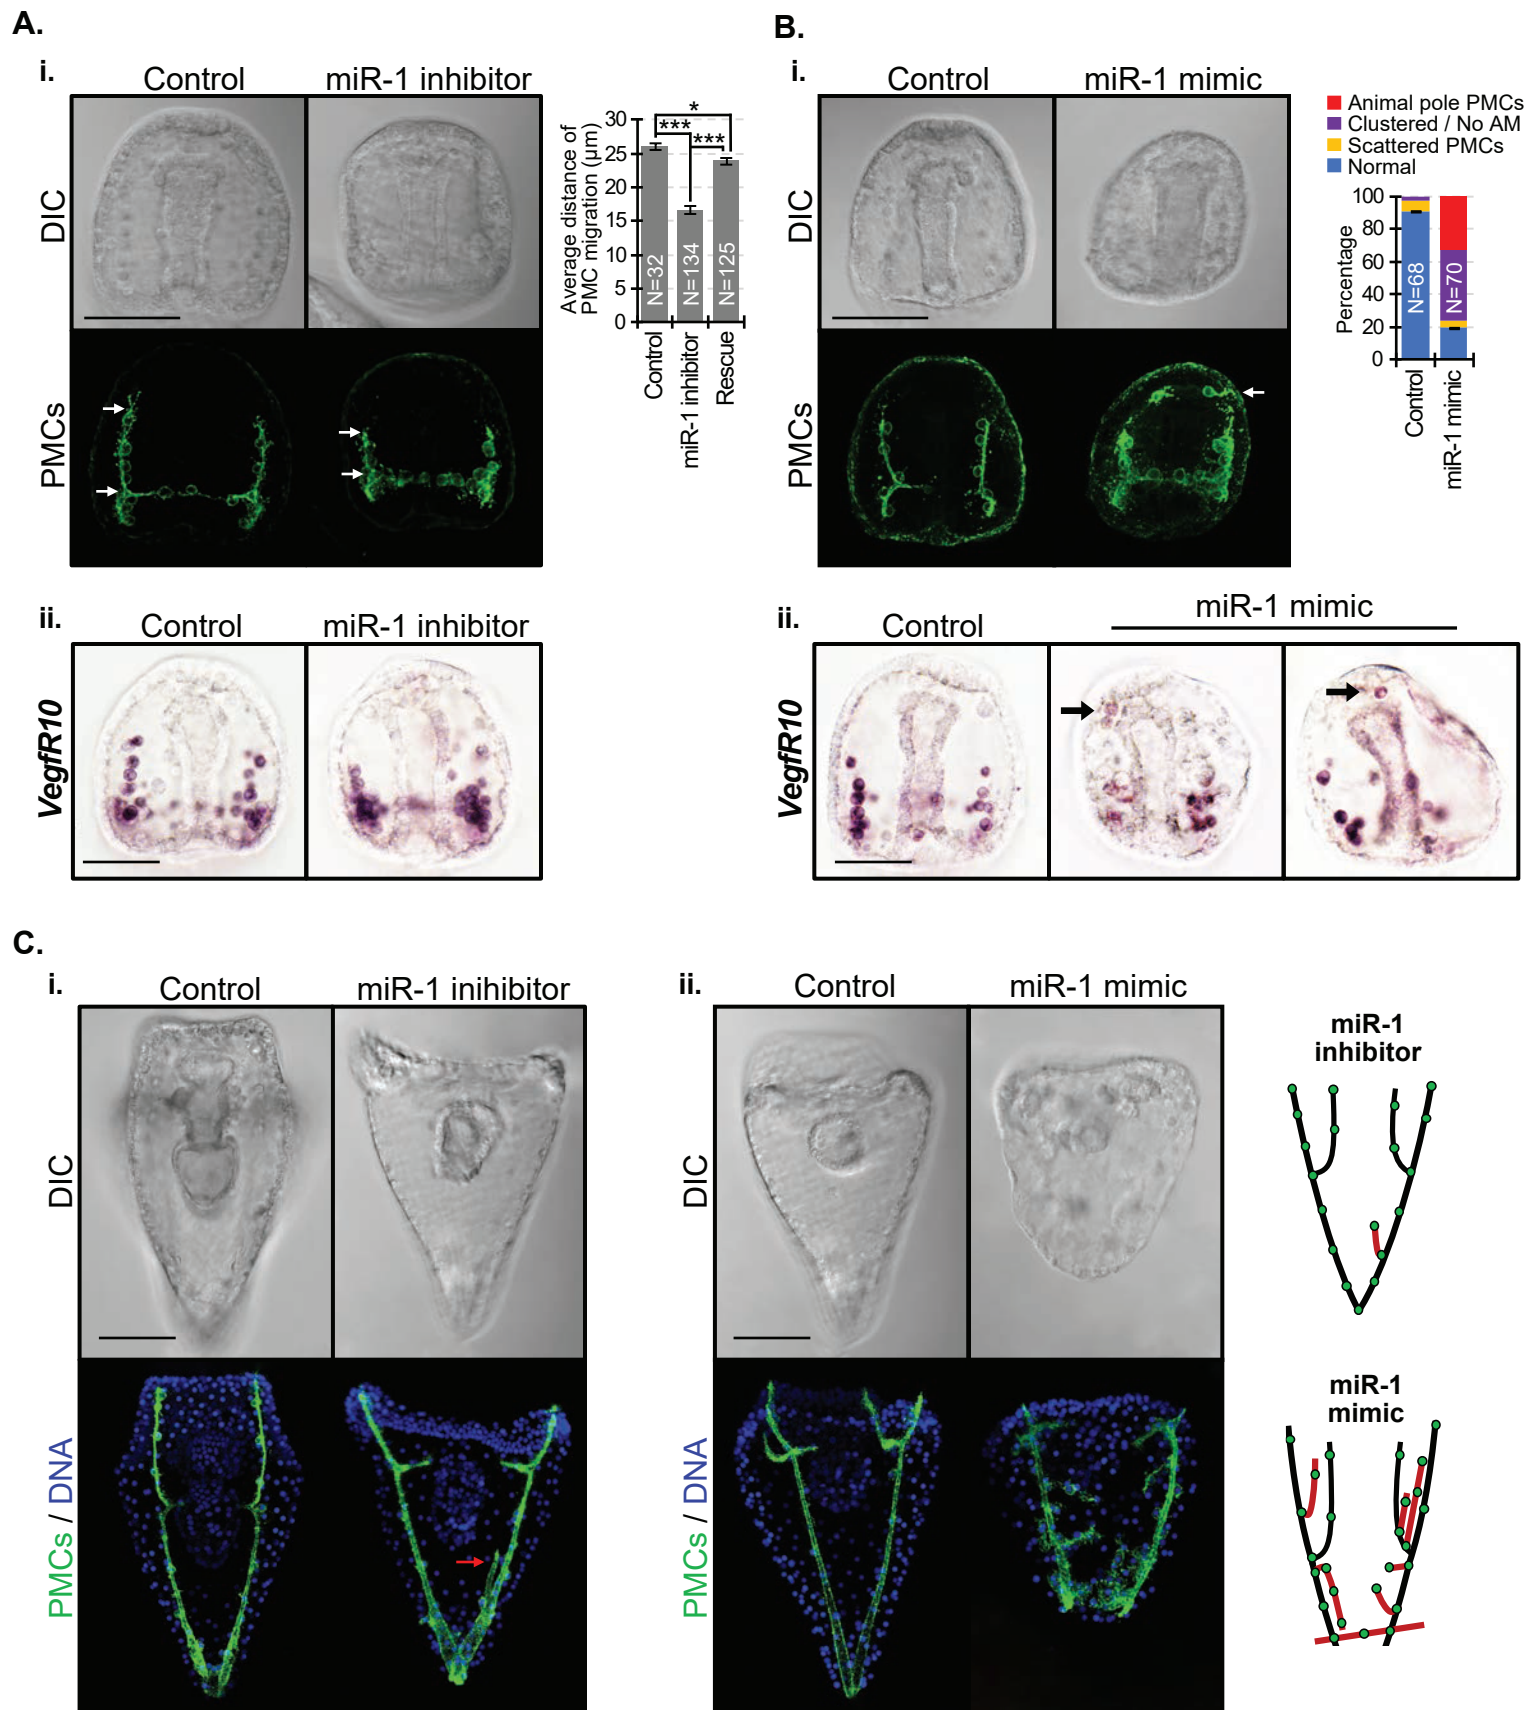



**Figure 9**

**A.**

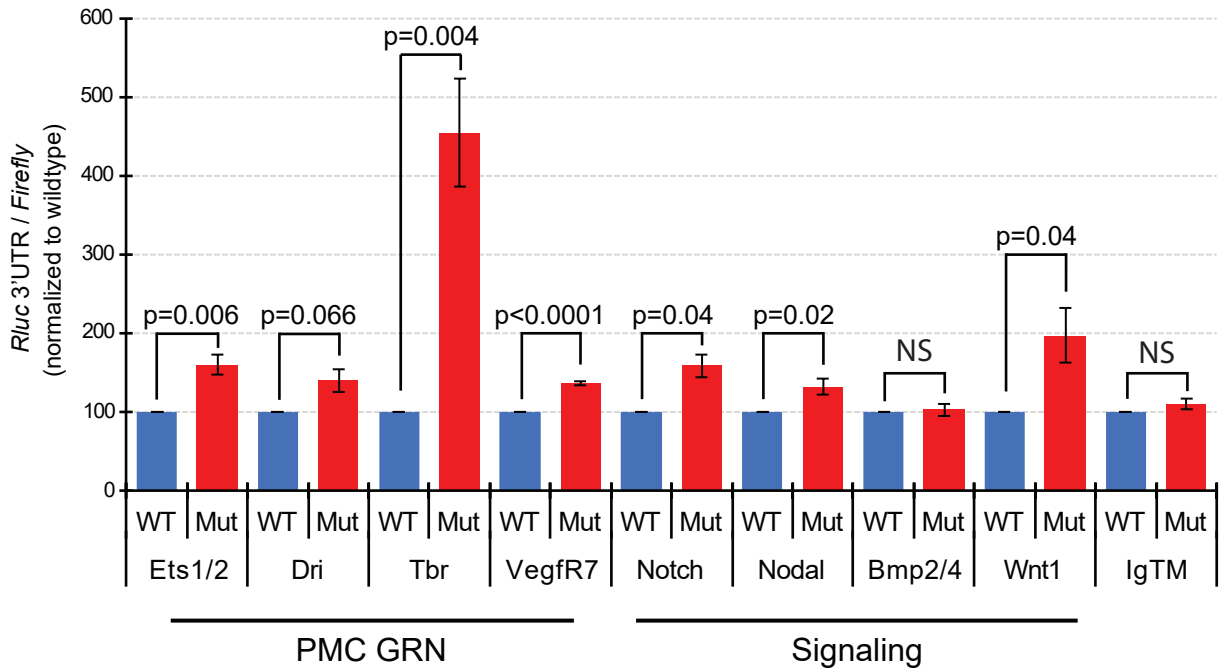

**B.**

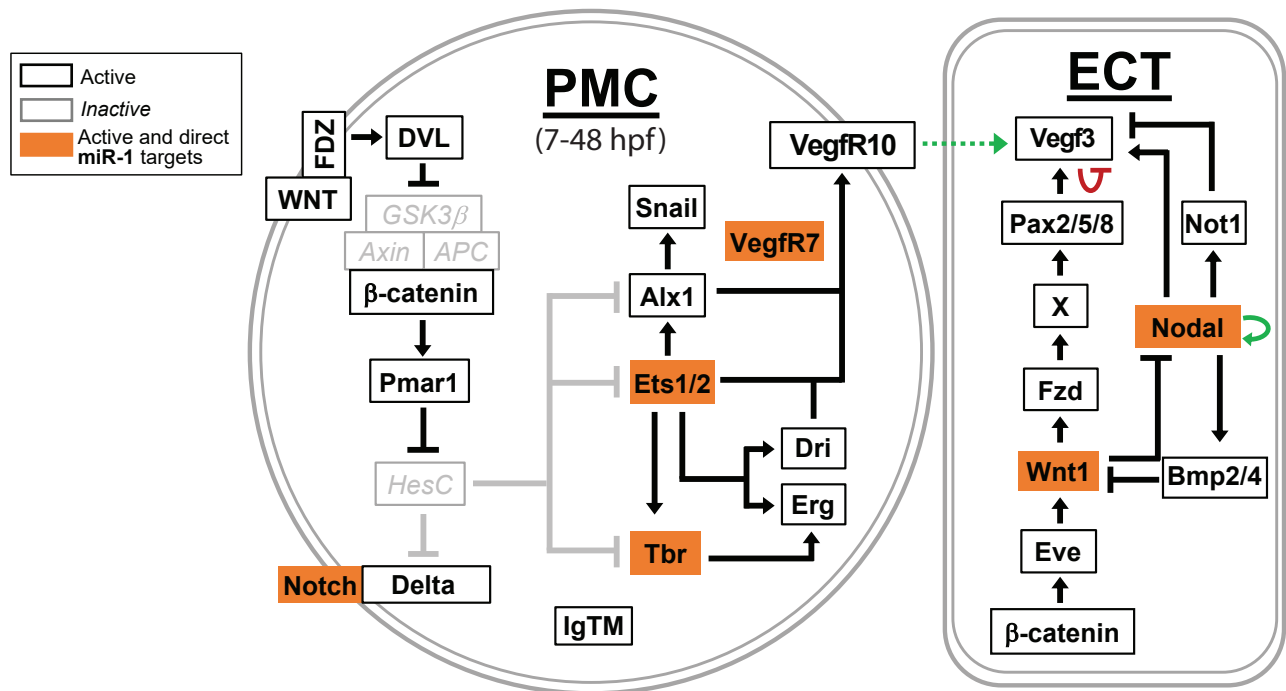

## Figure 10

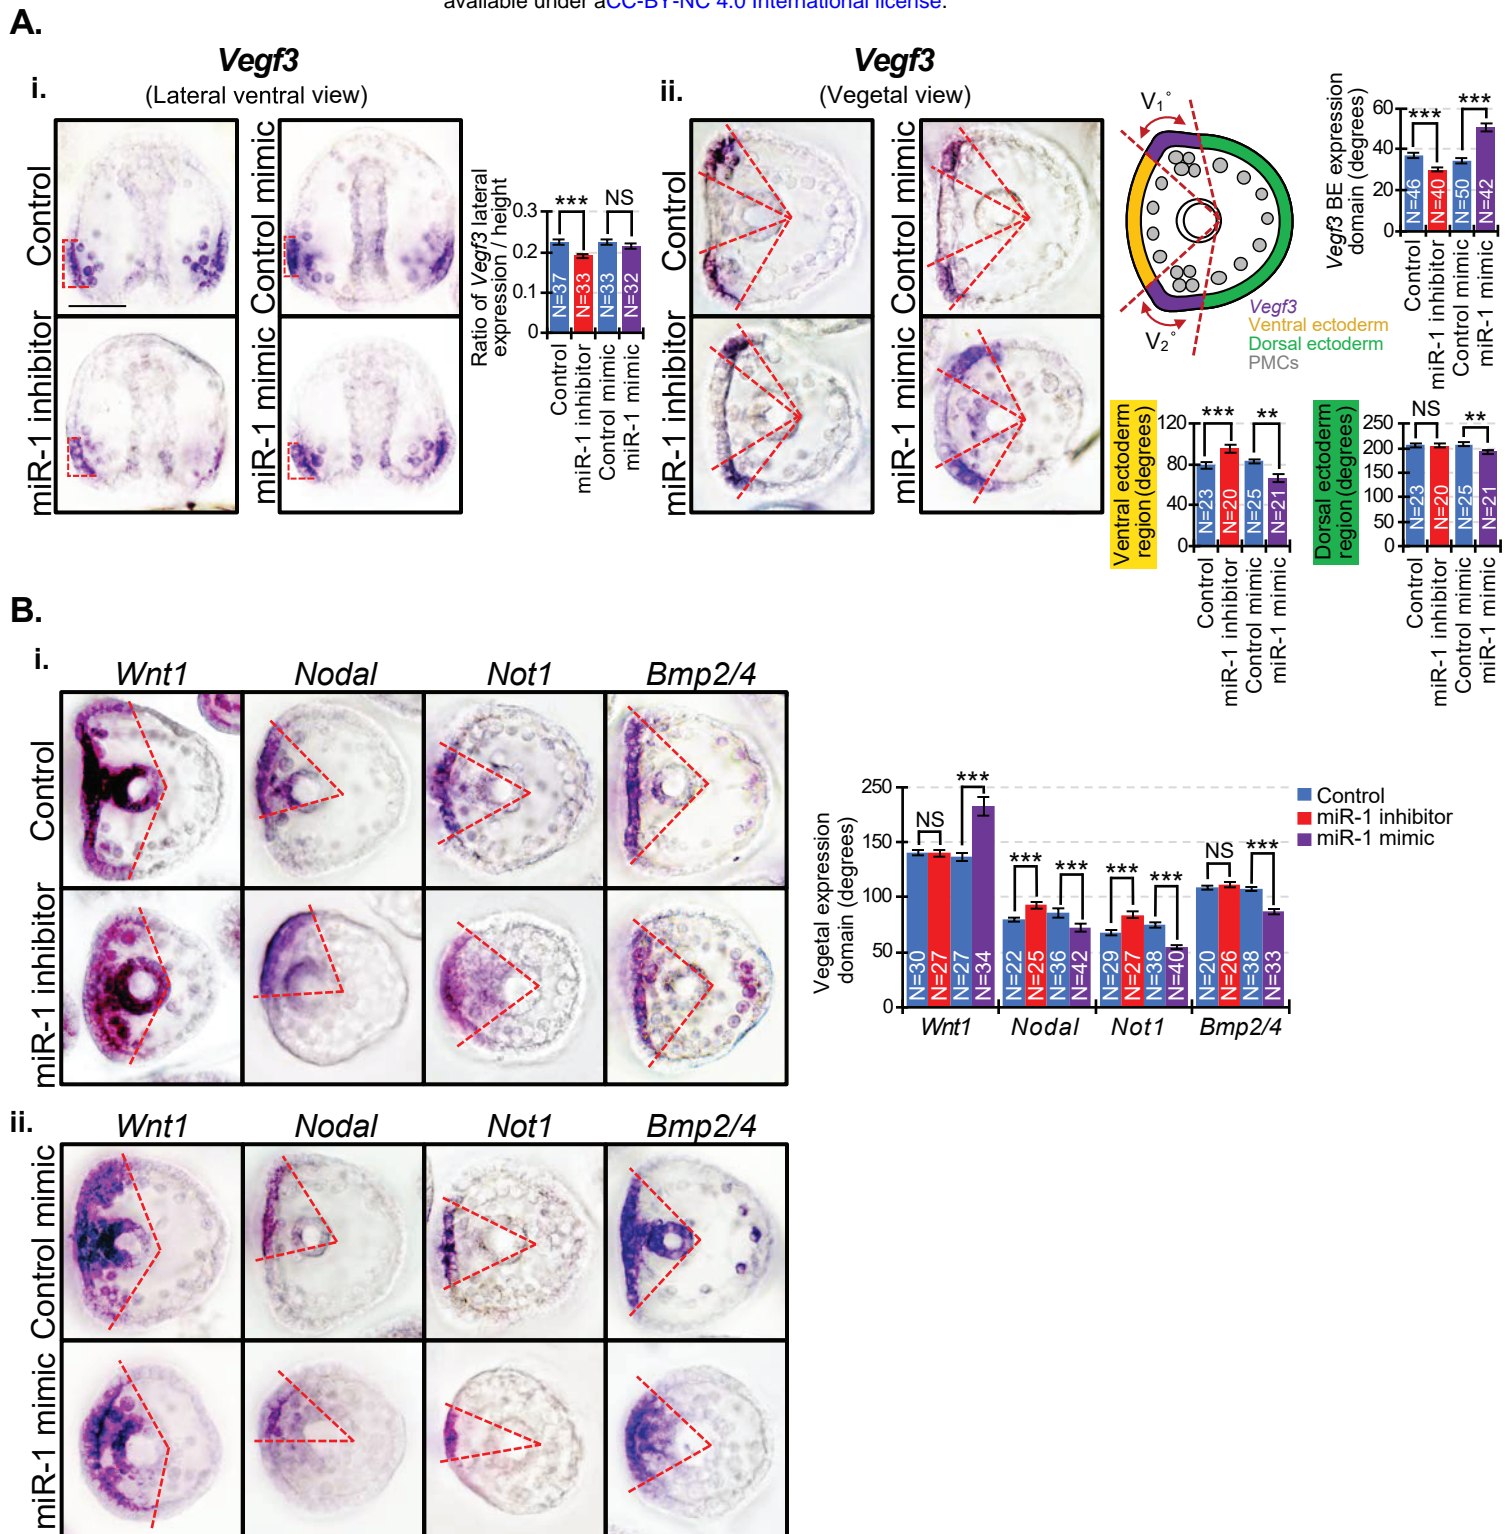

**Figure 11**

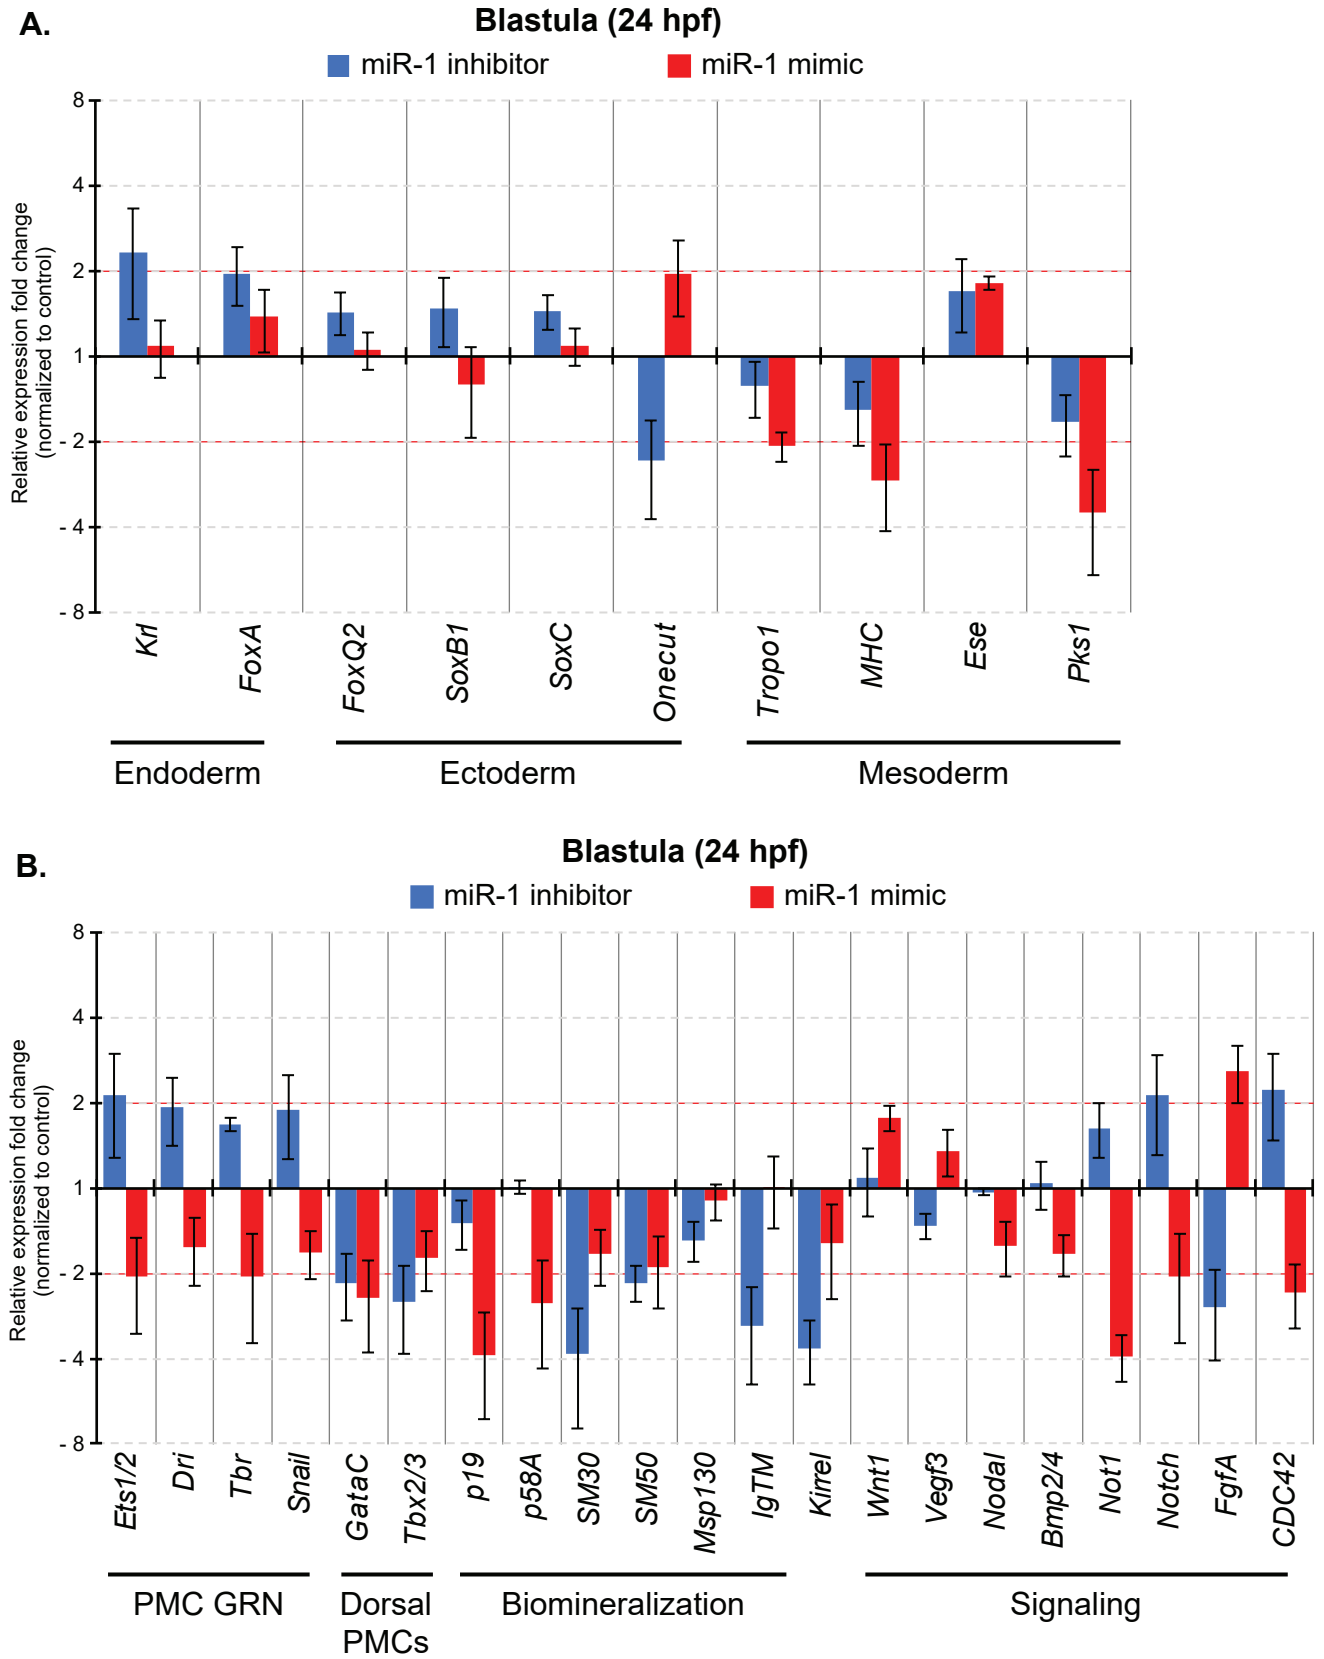

**Figure 12**

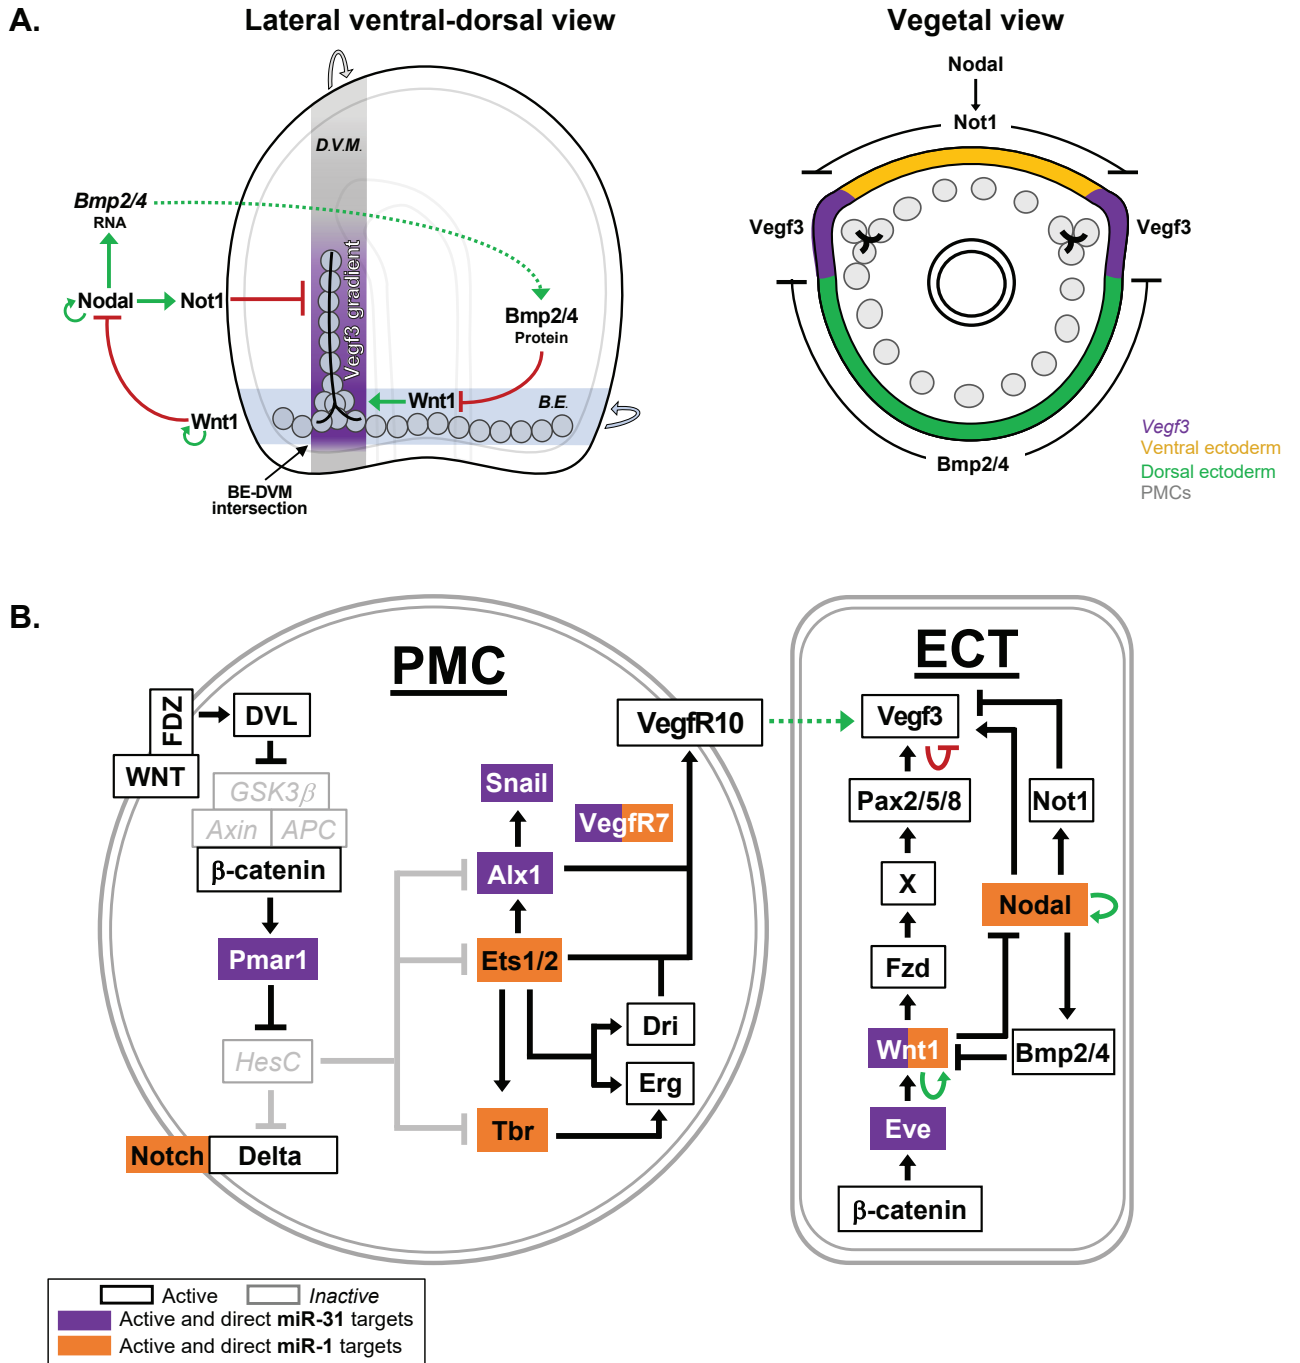

Source: https://www.biorxiv.org/content/10.1101/2022.02.27.482171v1.full.pdf
